# Supplementary material for: Direct Analysis in Real Time Mass Spectrometry for the Nondestructive Investigation of Conservation Treatments of Cultural Heritage
Source: Hindawi journal article supplement (doi:10.1155/2016/6853591), 2016-01-01
Supplement: f1 [file 6853591.f1.pdf]

# Title: Direct Analysis in Real Time Mass Spectrometry for the Non-destructive Investigation of Conservation Treatments of Cultural Heritage

Authors: Marcello Manfredi<sup>\*1</sup>, Elisa Robotti<sup>1</sup>, Greg Bearman<sup>2</sup>, Fenella France<sup>3</sup>, Elettra Barberis<sup>1</sup>, Pnina Shor<sup>4</sup>, Emilio Marengo<sup>1</sup>

**Supporting Information 1.** Weights of each original variable on the first and second Roots calculated by canonical analysis. For Root 1, weights with absolute value > 0.1 were considered statistically significant; for Root 2 instead, statistically significant weights were characterized by an absolute value > 0.05. Statistically significant weights were identified by Normal Probability plots.

| m/z    | Weight on Root 1 | Weight on Root 2 | m/z     | Weight on Root 1 | Weight on Root 2 | m/z     | Weight on Root 1 | Weight on Root 2 |
|--------|------------------|------------------|---------|------------------|------------------|---------|------------------|------------------|
| 75.037 | -0.131           | 0.027            | 188.078 | 0.084            | 0.066            | 259.056 | -0.011           | -0.053           |
| 81.058 | 0.021            | -0.028           | 188.086 | 0.009            | -0.016           | 259.062 | 0.012            | 0.017            |
| 81.063 | 0.072            | 0.052            | 188.091 | 0.018            | -0.049           | 259.077 | 0.003            | -0.016           |
| 83.039 | 0.018            | 0.020            | 188.1   | 0.024            | 0.017            | 259.125 | -0.012           | 0.005            |
| 83.044 | 0.012            | 0.017            | 188.106 | 0.035            | -0.042           | 259.133 | -0.008           | 0.002            |
| 83.073 | 0.133            | 0.111            | 188.115 | 0.034            | -0.001           | 259.14  | 0.012            | -0.023           |
| 83.078 | -0.005           | -0.038           | 188.123 | 0.030            | 0.031            | 259.147 | 0.056            | 0.076            |
| 85.018 | 0.213            | 0.047            | 188.131 | -0.002           | 0.017            | 259.155 | 0.017            | 0.020            |
| 85.052 | 0.124            | 0.139            | 188.147 | 0.025            | 0.013            | 259.164 | 0.017            | -0.049           |
| 85.057 | -0.008           | -0.062           | 188.155 | 0.025            | 0.029            | 259.176 | -0.005           | -0.010           |
| 85.072 | 0.013            | 0.002            | 188.163 | 0.016            | -0.016           | 259.185 | 0.007            | -0.016           |
| 85.078 | 0.007            | -0.001           | 188.171 | 0.002            | -0.030           | 259.195 | 0.006            | -0.004           |
| 85.086 | 0.070            | 0.119            | 188.18  | 0.008            | -0.004           | 259.214 | -0.012           | 0.003            |
| 85.091 | 0.011            | -0.022           | 188.195 | 0.025            | -0.006           | 259.223 | -0.014           | 0.004            |
| 85.099 | 0.010            | -0.006           | 188.212 | 0.056            | 0.043            | 259.286 | 0.006            | -0.002           |
| 85.132 | 0.010            | 0.003            | 188.243 | 0.018            | 0.020            | 260.06  | -0.013           | 0.001            |
| 86.05  | 0.131            | 0.079            | 189.042 | 0.001            | -0.046           | 260.069 | 0.066            | 0.012            |
| 86.055 | 0.011            | -0.013           | 189.052 | 0.006            | 0.006            | 260.081 | 0.010            | 0.003            |
| 86.083 | 0.109            | 0.033            | 189.063 | 0.060            | 0.134            | 260.098 | 0.011            | 0.030            |
| 86.09  | 0.004            | -0.008           | 189.072 | 0.003            | 0.029            | 260.105 | 0.036            | 0.055            |
| 86.107 | -0.010           | -0.007           | 189.082 | -0.032           | -0.040           | 260.111 | 0.034            | 0.026            |
| 86.112 | 0.015            | -0.062           | 189.089 | 0.033            | -0.022           | 260.12  | 0.017            | -0.034           |
| 86.128 | 0.007            | -0.009           | 189.094 | 0.010            | -0.010           | 260.13  | 0.005            | -0.004           |
| 86.134 | -0.012           | -0.042           | 189.1   | -0.022           | -0.052           | 260.14  | 0.044            | 0.020            |
| 86.139 | 0.007            | -0.008           | 189.12  | -0.014           | 0.002            | 260.149 | 0.030            | -0.011           |
| 86.147 | 0.024            | 0.019            | 189.136 | 0.003            | -0.009           | 260.156 | 0.021            | -0.026           |
| 86.166 | 0.020            | 0.012            | 189.145 | 0.006            | -0.011           | 260.162 | 0.041            | 0.034            |
| 87.033 | 0.112            | 0.076            | 189.177 | 0.021            | 0.034            | 260.173 | -0.020           | 0.025            |
| 87.06  | 0.064            | 0.071            | 189.193 | 0.015            | 0.002            | 260.187 | 0.032            | 0.002            |
| 87.066 | 0.042            | 0.034            | 189.202 | 0.012            | 0.017            | 260.195 | 0.022            | -0.018           |
| 87.071 | -0.005           | -0.029           | 189.209 | 0.017            | 0.015            | 260.205 | 0.007            | -0.008           |
| 87.076 | 0.002            | 0.013            | 189.226 | 0.009            | 0.003            | 260.233 | -0.002           | -0.054           |
| 87.082 | 0.007            | -0.049           | 189.241 | 0.010            | -0.023           | 261.052 | -0.005           | -0.038           |

|        |        |        |         |        |        |         |        |        |
|--------|--------|--------|---------|--------|--------|---------|--------|--------|
| 87.087 | 0.015  | -0.016 | 190.077 | -0.050 | 0.045  | 261.075 | 0.041  | 0.040  |
| 87.092 | -0.015 | 0.002  | 190.082 | 0.027  | -0.033 | 261.085 | 0.020  | 0.013  |
| 87.098 | -0.015 | 0.007  | 190.088 | 0.006  | -0.015 | 261.097 | 0.016  | 0.014  |
| 87.103 | -0.024 | 0.005  | 190.185 | 0.012  | -0.014 | 261.107 | 0.023  | 0.052  |
| 87.109 | 0.009  | -0.006 | 190.193 | -0.055 | 0.008  | 261.113 | 0.017  | 0.048  |
| 87.115 | 0.016  | 0.013  | 190.209 | -0.011 | -0.053 | 261.122 | 0.002  | -0.038 |
| 87.126 | 0.028  | 0.036  | 190.217 | -0.005 | -0.011 | 261.129 | 0.008  | 0.022  |
| 87.131 | 0.017  | 0.027  | 190.229 | -0.065 | 0.014  | 261.135 | 0.013  | -0.013 |
| 87.136 | 0.025  | 0.010  | 190.242 | 0.027  | 0.008  | 261.141 | 0.017  | 0.019  |
| 87.142 | 0.091  | 0.074  | 190.25  | 0.011  | 0.004  | 261.15  | 0.007  | 0.007  |
| 87.147 | 0.011  | 0.016  | 190.258 | -0.003 | -0.022 | 261.16  | 0.038  | 0.040  |
| 87.156 | 0.043  | 0.057  | 190.266 | 0.008  | 0.050  | 261.173 | 0.009  | 0.011  |
| 87.161 | 0.028  | 0.004  | 190.278 | -0.036 | 0.051  | 261.188 | 0.034  | 0.086  |
| 87.169 | 0.033  | 0.037  | 190.297 | 0.007  | -0.004 | 261.198 | 0.013  | -0.002 |
| 87.18  | 0.022  | 0.031  | 190.306 | 0.007  | 0.010  | 261.207 | 0.001  | -0.036 |
| 87.191 | 0.007  | 0.010  | 190.314 | -0.012 | 0.003  | 261.245 | 0.003  | -0.029 |
| 88.027 | 0.030  | 0.057  | 191.083 | -0.161 | 0.053  | 261.254 | -0.005 | -0.038 |
| 88.033 | 0.032  | -0.009 | 191.1   | 0.089  | 0.045  | 262.027 | -0.001 | -0.050 |
| 88.063 | 0.126  | 0.039  | 191.107 | 0.077  | -0.099 | 262.043 | 0.007  | -0.022 |
| 88.068 | -0.024 | 0.000  | 191.113 | 0.016  | -0.022 | 262.06  | 0.012  | 0.024  |
| 88.09  | 0.087  | 0.073  | 191.122 | 0.029  | 0.085  | 262.069 | 0.034  | 0.049  |
| 88.095 | 0.037  | -0.079 | 191.22  | 0.006  | 0.006  | 262.075 | 0.002  | -0.030 |
| 88.101 | 0.001  | -0.007 | 191.228 | 0.074  | 0.037  | 262.086 | 0.013  | 0.005  |
| 88.117 | -0.015 | 0.003  | 191.236 | -0.003 | -0.007 | 262.099 | 0.008  | -0.025 |
| 88.123 | -0.012 | 0.005  | 191.252 | -0.005 | -0.021 | 262.11  | 0.019  | 0.015  |
| 88.139 | 0.002  | -0.003 | 191.26  | 0.075  | -0.009 | 262.118 | 0.012  | 0.024  |
| 88.145 | 0.070  | 0.076  | 191.268 | 0.023  | -0.025 | 262.126 | 0.027  | 0.029  |
| 88.15  | 0.054  | -0.036 | 191.276 | 0.010  | -0.012 | 262.136 | 0.033  | 0.040  |
| 88.156 | 0.026  | 0.003  | 191.285 | 0.005  | -0.005 | 262.145 | 0.051  | 0.075  |
| 88.164 | 0.044  | -0.005 | 191.293 | 0.040  | 0.008  | 262.153 | 0.004  | -0.064 |
| 88.169 | 0.053  | -0.038 | 191.3   | 0.040  | -0.022 | 262.158 | 0.006  | -0.011 |
| 88.175 | 0.043  | -0.016 | 191.309 | 0.062  | -0.037 | 262.164 | 0.052  | 0.058  |
| 88.18  | 0.020  | 0.005  | 191.316 | 0.019  | 0.024  | 262.173 | 0.008  | -0.065 |
| 88.194 | 0.092  | -0.004 | 191.325 | 0.009  | -0.010 | 262.183 | 0.007  | 0.007  |
| 88.205 | 0.005  | -0.005 | 192.02  | 0.010  | 0.010  | 262.201 | 0.007  | -0.005 |
| 88.214 | 0.009  | -0.061 | 192.043 | 0.010  | 0.012  | 262.211 | 0.008  | -0.006 |
| 89.01  | 0.034  | 0.031  | 192.051 | 0.010  | 0.006  | 262.23  | -0.005 | -0.038 |
| 89.018 | 0.043  | 0.037  | 192.112 | -0.094 | 0.006  | 263.066 | -0.002 | -0.026 |
| 89.049 | 0.110  | 0.065  | 192.119 | -0.007 | -0.023 | 263.099 | 0.000  | -0.017 |
| 89.071 | -0.013 | 0.018  | 192.184 | 0.012  | -0.007 | 263.106 | 0.015  | 0.031  |
| 89.076 | 0.075  | 0.104  | 192.192 | 0.005  | -0.007 | 263.114 | -0.066 | -0.024 |
| 89.087 | 0.005  | -0.009 | 192.222 | 0.013  | 0.004  | 263.119 | 0.007  | 0.032  |
| 89.093 | -0.034 | 0.012  | 192.229 | 0.007  | 0.005  | 263.125 | 0.050  | 0.085  |
| 89.098 | 0.114  | 0.095  | 192.258 | -0.006 | -0.013 | 263.13  | 0.012  | -0.043 |
| 89.104 | 0.014  | -0.017 | 192.265 | -0.109 | -0.006 | 263.135 | 0.000  | -0.012 |
| 89.109 | 0.005  | -0.009 | 192.273 | -0.013 | 0.000  | 263.142 | 0.007  | -0.025 |
| 89.115 | 0.012  | 0.006  | 192.282 | -0.014 | 0.000  | 263.151 | -0.001 | 0.015  |

|        |        |        |         |        |        |         |        |        |
|--------|--------|--------|---------|--------|--------|---------|--------|--------|
| 89.12  | 0.029  | 0.021  | 192.287 | -0.005 | -0.006 | 263.16  | 0.012  | -0.011 |
| 89.126 | 0.056  | 0.070  | 192.294 | -0.008 | -0.004 | 263.17  | 0.002  | 0.016  |
| 89.131 | -0.009 | -0.059 | 192.339 | -0.014 | 0.000  | 263.179 | 0.005  | 0.001  |
| 89.137 | 0.010  | 0.012  | 192.347 | -0.017 | -0.001 | 263.189 | -0.026 | -0.003 |
| 89.142 | -0.003 | -0.063 | 193.028 | 0.046  | 0.054  | 263.217 | 0.017  | 0.028  |
| 89.148 | 0.103  | 0.131  | 193.034 | -0.007 | -0.062 | 263.226 | -0.014 | 0.004  |
| 89.153 | 0.000  | -0.034 | 193.049 | 0.011  | 0.043  | 263.304 | 0.014  | 0.039  |
| 89.159 | 0.010  | 0.012  | 193.054 | 0.005  | -0.005 | 264.031 | 0.012  | 0.017  |
| 89.17  | 0.068  | 0.069  | 193.062 | 0.007  | 0.005  | 264.059 | 0.024  | 0.029  |
| 89.175 | -0.011 | -0.053 | 193.07  | 0.014  | 0.041  | 264.088 | -0.134 | 0.015  |
| 90.041 | 0.146  | 0.063  | 193.078 | 0.005  | -0.027 | 264.095 | -0.052 | 0.041  |
| 90.046 | 0.016  | 0.012  | 193.09  | 0.024  | -0.002 | 264.102 | 0.022  | -0.034 |
| 90.076 | 0.130  | -0.024 | 193.096 | 0.046  | 0.054  | 264.111 | 0.033  | 0.039  |
| 90.082 | -0.016 | 0.000  | 193.104 | 0.035  | 0.023  | 264.122 | 0.013  | -0.012 |
| 90.101 | 0.018  | -0.059 | 193.111 | -0.113 | -0.069 | 264.127 | 0.018  | 0.012  |
| 90.106 | 0.031  | -0.027 | 193.116 | -0.015 | -0.006 | 264.135 | 0.018  | 0.004  |
| 90.112 | 0.012  | 0.035  | 193.123 | 0.024  | 0.031  | 264.143 | -0.013 | 0.004  |
| 90.129 | 0.012  | 0.017  | 193.152 | -0.012 | 0.005  | 264.149 | 0.019  | 0.054  |
| 90.14  | 0.006  | -0.027 | 193.16  | 0.005  | -0.009 | 264.159 | 0.004  | 0.017  |
| 91.027 | -0.143 | 0.060  | 193.188 | -0.022 | 0.005  | 264.168 | 0.004  | 0.028  |
| 91.036 | 0.009  | 0.059  | 193.2   | 0.012  | 0.035  | 264.186 | 0.019  | 0.018  |
| 91.046 | -0.019 | 0.002  | 193.209 | -0.002 | -0.026 | 264.202 | 0.010  | 0.010  |
| 91.055 | 0.041  | 0.056  | 193.225 | 0.044  | 0.046  | 265.051 | 0.002  | -0.030 |
| 91.062 | 0.014  | 0.044  | 193.233 | 0.007  | -0.010 | 265.065 | 0.015  | 0.026  |
| 91.07  | -0.014 | 0.004  | 193.262 | 0.010  | 0.003  | 265.087 | 0.013  | -0.002 |
| 91.082 | -0.021 | 0.001  | 194.024 | 0.029  | 0.030  | 265.093 | 0.001  | 0.027  |
| 91.087 | 0.015  | 0.022  | 194.038 | 0.010  | 0.010  | 265.1   | -0.059 | 0.034  |
| 91.104 | 0.015  | 0.014  | 194.054 | 0.034  | 0.043  | 265.106 | -0.002 | -0.055 |
| 91.11  | 0.040  | 0.086  | 194.063 | 0.012  | 0.017  | 265.112 | 0.032  | 0.026  |
| 91.132 | 0.010  | 0.014  | 194.068 | 0.075  | 0.082  | 265.121 | -0.015 | 0.026  |
| 92.06  | 0.049  | 0.019  | 194.074 | 0.018  | 0.021  | 265.128 | 0.017  | -0.011 |
| 93.037 | -0.133 | 0.020  | 194.08  | -0.013 | -0.043 | 265.134 | 0.003  | -0.008 |
| 93.042 | -0.102 | 0.017  | 194.089 | -0.091 | 0.023  | 265.141 | 0.013  | -0.002 |
| 93.059 | 0.013  | -0.014 | 194.096 | -0.087 | 0.007  | 265.15  | -0.046 | 0.013  |
| 93.065 | 0.009  | -0.005 | 194.106 | 0.009  | -0.022 | 265.159 | 0.023  | 0.000  |
| 93.07  | 0.008  | -0.004 | 194.114 | 0.047  | 0.040  | 265.164 | 0.016  | 0.048  |
| 93.076 | 0.040  | 0.034  | 194.121 | 0.079  | -0.095 | 265.178 | -0.025 | 0.004  |
| 93.082 | 0.000  | -0.068 | 194.129 | 0.054  | 0.016  | 265.188 | 0.001  | 0.011  |
| 93.087 | 0.006  | -0.034 | 194.137 | 0.010  | 0.003  | 265.197 | 0.026  | 0.006  |
| 93.093 | -0.222 | 0.031  | 194.163 | 0.058  | 0.084  | 265.206 | 0.012  | 0.035  |
| 93.104 | 0.010  | 0.012  | 194.17  | 0.009  | -0.051 | 265.216 | -0.027 | 0.012  |
| 93.109 | 0.006  | -0.002 | 194.178 | 0.010  | 0.006  | 265.226 | -0.002 | -0.018 |
| 93.132 | -0.014 | 0.004  | 194.195 | 0.016  | 0.008  | 265.235 | 0.023  | 0.003  |
| 93.138 | -0.112 | 0.007  | 194.203 | 0.006  | -0.031 | 265.255 | 0.022  | 0.029  |
| 93.155 | -0.121 | 0.022  | 195.02  | 0.097  | 0.020  | 265.263 | -0.002 | -0.026 |
| 93.186 | -0.213 | 0.032  | 195.026 | 0.015  | -0.007 | 265.273 | 0.020  | -0.023 |
| 93.223 | -0.205 | 0.032  | 195.034 | -0.032 | 0.036  | 266.073 | 0.009  | 0.009  |

|        |        |        |         |        |        |         |        |        |
|--------|--------|--------|---------|--------|--------|---------|--------|--------|
| 93.248 | -0.231 | 0.035  | 195.042 | -0.027 | 0.004  | 266.08  | 0.007  | -0.022 |
| 93.271 | -0.182 | 0.029  | 195.047 | 0.011  | -0.007 | 266.096 | 0.015  | 0.011  |
| 93.294 | -0.063 | 0.011  | 195.056 | 0.001  | -0.001 | 266.102 | 0.010  | 0.012  |
| 93.39  | -0.016 | 0.001  | 195.065 | 0.046  | 0.031  | 266.114 | 0.019  | 0.039  |
| 93.412 | -0.016 | 0.001  | 195.076 | -0.005 | 0.017  | 266.123 | 0.008  | -0.016 |
| 93.435 | -0.016 | 0.001  | 195.085 | 0.001  | 0.026  | 266.134 | 0.039  | 0.085  |
| 93.574 | -0.112 | 0.014  | 195.094 | 0.010  | 0.012  | 266.141 | -0.003 | -0.044 |
| 93.58  | -0.023 | 0.006  | 195.113 | -0.019 | -0.023 | 266.146 | 0.010  | 0.006  |
| 93.591 | -0.095 | 0.018  | 195.119 | -0.028 | -0.009 | 266.152 | 0.058  | 0.026  |
| 93.596 | -0.030 | 0.002  | 195.126 | 0.140  | -0.021 | 266.161 | 0.060  | 0.016  |
| 93.607 | -0.024 | 0.007  | 195.133 | 0.012  | 0.017  | 266.169 | 0.014  | -0.007 |
| 93.616 | -0.112 | 0.018  | 195.159 | 0.004  | 0.017  | 266.189 | 0.036  | 0.017  |
| 93.63  | -0.024 | 0.007  | 195.167 | -0.005 | -0.049 | 266.219 | 0.009  | 0.009  |
| 93.636 | -0.083 | 0.017  | 195.2   | 0.009  | 0.011  | 266.228 | 0.021  | -0.048 |
| 93.658 | -0.028 | 0.010  | 195.208 | 0.009  | -0.012 | 266.237 | 0.007  | 0.005  |
| 94.036 | 0.009  | 0.003  | 195.216 | 0.102  | -0.067 | 266.262 | -0.002 | -0.026 |
| 94.044 | -0.201 | 0.033  | 195.241 | 0.004  | -0.032 | 267.095 | 0.061  | -0.027 |
| 94.05  | 0.031  | 0.040  | 195.249 | 0.066  | -0.048 | 267.101 | 0.070  | 0.047  |
| 94.07  | -0.031 | 0.020  | 195.257 | 0.012  | 0.017  | 267.11  | -0.113 | 0.040  |
| 94.095 | -0.201 | 0.062  | 195.265 | 0.010  | 0.010  | 267.118 | -0.091 | 0.010  |
| 94.101 | 0.026  | -0.017 | 195.282 | 0.021  | -0.013 | 267.125 | 0.006  | -0.011 |
| 94.12  | -0.207 | 0.034  | 196.018 | 0.006  | -0.002 | 267.131 | 0.003  | -0.003 |
| 94.135 | -0.012 | 0.003  | 196.044 | 0.005  | -0.005 | 267.137 | 0.009  | -0.010 |
| 94.141 | -0.139 | 0.027  | 196.055 | 0.018  | 0.012  | 267.147 | 0.013  | -0.028 |
| 94.146 | -0.014 | 0.002  | 196.06  | -0.012 | 0.003  | 267.156 | 0.009  | 0.004  |
| 94.158 | -0.024 | 0.005  | 196.066 | 0.089  | 0.071  | 267.165 | 0.021  | 0.029  |
| 94.163 | -0.139 | 0.027  | 196.072 | 0.038  | 0.008  | 267.184 | 0.002  | -0.028 |
| 94.186 | -0.041 | 0.006  | 196.078 | 0.007  | -0.004 | 267.194 | 0.015  | 0.020  |
| 94.195 | -0.048 | 0.003  | 196.092 | 0.014  | -0.006 | 267.204 | 0.005  | 0.004  |
| 95.032 | 0.113  | 0.075  | 196.101 | -0.002 | -0.026 | 267.246 | -0.012 | 0.003  |
| 95.038 | -0.008 | -0.006 | 196.115 | -0.012 | 0.003  | 268.023 | 0.017  | 0.004  |
| 95.043 | -0.205 | 0.033  | 196.121 | 0.124  | 0.069  | 268.035 | 0.009  | -0.041 |
| 95.052 | 0.036  | 0.038  | 196.127 | 0.009  | -0.014 | 268.083 | 0.020  | 0.009  |
| 95.057 | 0.013  | -0.011 | 196.158 | 0.010  | 0.006  | 268.09  | 0.041  | 0.030  |
| 95.064 | 0.005  | 0.051  | 197.037 | -0.005 | -0.038 | 268.095 | -0.012 | 0.005  |
| 95.069 | 0.067  | 0.018  | 197.063 | 0.013  | -0.031 | 268.103 | 0.068  | 0.092  |
| 95.074 | -0.008 | 0.007  | 197.07  | 0.003  | -0.034 | 268.111 | -0.031 | 0.034  |
| 95.092 | -0.016 | 0.023  | 197.077 | -0.037 | 0.011  | 268.119 | -0.058 | -0.021 |
| 95.097 | 0.005  | 0.043  | 197.084 | 0.065  | 0.110  | 268.124 | -0.028 | -0.050 |
| 97.011 | 0.087  | 0.034  | 197.09  | -0.036 | 0.005  | 268.13  | -0.042 | 0.002  |
| 97.016 | -0.011 | 0.045  | 197.095 | 0.036  | 0.045  | 268.139 | 0.032  | -0.025 |
| 97.044 | 0.109  | 0.073  | 197.106 | 0.025  | -0.013 | 268.145 | 0.023  | -0.026 |
| 97.049 | 0.005  | -0.039 | 197.131 | 0.018  | 0.007  | 268.152 | -0.008 | 0.017  |
| 97.078 | 0.038  | 0.061  | 197.138 | -0.003 | -0.002 | 268.161 | 0.029  | 0.045  |
| 97.083 | 0.058  | -0.015 | 197.144 | 0.018  | -0.018 | 268.19  | 0.026  | 0.044  |
| 97.1   | 0.010  | -0.014 | 197.152 | 0.006  | 0.006  | 268.2   | 0.012  | -0.020 |
| 97.105 | -0.029 | 0.000  | 197.169 | 0.054  | 0.049  | 268.237 | -0.004 | -0.048 |

|         |        |        |         |        |        |         |        |        |
|---------|--------|--------|---------|--------|--------|---------|--------|--------|
| 97.112  | -0.010 | -0.005 | 197.176 | 0.001  | 0.019  | 268.282 | 0.009  | 0.011  |
| 97.123  | -0.004 | -0.006 | 197.184 | -0.001 | -0.033 | 268.325 | 0.008  | -0.004 |
| 97.129  | 0.014  | 0.034  | 198.041 | 0.010  | 0.014  | 269.022 | 0.017  | 0.018  |
| 97.135  | 0.006  | 0.006  | 198.053 | 0.002  | -0.030 | 269.041 | 0.010  | 0.006  |
| 98.049  | 0.040  | 0.077  | 198.06  | 0.037  | 0.046  | 269.094 | -0.013 | 0.001  |
| 98.075  | -0.027 | 0.010  | 198.069 | 0.040  | 0.017  | 269.099 | -0.159 | 0.018  |
| 98.08   | 0.116  | 0.027  | 198.074 | 0.031  | 0.032  | 269.109 | 0.113  | 0.147  |
| 98.101  | 0.010  | -0.017 | 198.084 | 0.015  | 0.007  | 269.119 | 0.014  | -0.066 |
| 98.106  | 0.051  | 0.002  | 198.107 | 0.021  | -0.006 | 269.127 | 0.033  | -0.052 |
| 98.112  | 0.014  | 0.007  | 198.115 | 0.009  | -0.039 | 269.132 | 0.017  | -0.027 |
| 98.13   | -0.008 | -0.008 | 198.121 | 0.019  | -0.011 | 269.14  | 0.000  | -0.007 |
| 98.135  | 0.170  | 0.070  | 198.126 | -0.011 | -0.053 | 269.146 | -0.006 | -0.002 |
| 98.156  | 0.093  | 0.034  | 198.132 | 0.098  | 0.095  | 269.16  | -0.012 | 0.009  |
| 98.161  | 0.022  | 0.030  | 198.139 | 0.054  | 0.040  | 269.169 | 0.009  | 0.050  |
| 98.176  | 0.008  | -0.004 | 198.144 | -0.012 | 0.004  | 269.179 | 0.026  | 0.026  |
| 98.182  | 0.006  | -0.011 | 198.173 | 0.010  | 0.006  | 269.189 | -0.014 | 0.004  |
| 98.187  | 0.013  | 0.003  | 198.18  | 0.051  | 0.067  | 269.208 | 0.003  | -0.012 |
| 98.97   | 0.058  | -0.018 | 199.044 | 0.002  | -0.030 | 269.217 | 0.111  | 0.083  |
| 99.029  | 0.081  | 0.018  | 199.054 | 0.036  | 0.039  | 269.222 | 0.010  | -0.015 |
| 99.065  | 0.117  | 0.086  | 199.062 | 0.004  | -0.029 | 269.246 | -0.012 | 0.003  |
| 99.07   | 0.006  | -0.007 | 199.07  | -0.120 | 0.018  | 269.255 | 0.028  | -0.012 |
| 99.144  | 0.018  | -0.010 | 199.077 | -0.042 | 0.002  | 269.285 | 0.016  | 0.018  |
| 99.15   | -0.013 | 0.001  | 199.098 | -0.013 | 0.001  | 269.293 | 0.039  | 0.044  |
| 99.205  | 0.010  | 0.014  | 199.107 | -0.012 | 0.005  | 269.323 | 0.006  | -0.002 |
| 100.094 | 0.125  | -0.072 | 199.115 | 0.033  | 0.075  | 269.332 | 0.039  | 0.067  |
| 100.179 | 0.007  | 0.010  | 199.121 | 0.105  | -0.066 | 269.341 | 0.020  | 0.014  |
| 100.202 | -0.016 | 0.000  | 199.162 | -0.016 | -0.003 | 269.377 | 0.027  | 0.018  |
| 100.208 | 0.012  | 0.011  | 199.195 | -0.016 | 0.001  | 270.027 | 0.020  | 0.034  |
| 100.214 | -0.026 | 0.001  | 199.204 | -0.012 | 0.005  | 270.036 | 0.030  | -0.026 |
| 100.24  | 0.003  | -0.008 | 199.228 | 0.003  | -0.009 | 270.045 | 0.022  | 0.032  |
| 100.269 | -0.028 | 0.010  | 199.237 | 0.015  | -0.005 | 270.074 | 0.012  | 0.024  |
| 100.379 | 0.003  | -0.009 | 199.245 | 0.003  | -0.008 | 270.084 | 0.005  | 0.026  |
| 100.391 | 0.014  | -0.018 | 199.259 | 0.003  | -0.009 | 270.09  | 0.012  | 0.017  |
| 100.398 | 0.032  | 0.020  | 199.27  | 0.029  | -0.026 | 270.101 | 0.010  | 0.006  |
| 101.045 | 0.154  | 0.094  | 200.02  | 0.009  | 0.003  | 270.116 | 0.038  | 0.034  |
| 101.05  | -0.005 | -0.038 | 200.036 | 0.010  | 0.014  | 270.125 | 0.031  | -0.043 |
| 101.087 | 0.116  | 0.165  | 200.043 | 0.007  | 0.010  | 270.132 | 0.013  | 0.055  |
| 101.093 | -0.034 | -0.081 | 200.05  | -0.003 | -0.043 | 270.138 | 0.008  | -0.030 |
| 101.1   | 0.058  | -0.103 | 200.056 | 0.027  | 0.016  | 270.145 | 0.029  | 0.015  |
| 101.124 | -0.012 | 0.005  | 200.062 | 0.048  | -0.054 | 270.15  | 0.007  | -0.005 |
| 101.129 | 0.010  | 0.021  | 200.072 | 0.029  | 0.026  | 270.17  | 0.007  | -0.009 |
| 101.148 | -0.012 | 0.005  | 200.082 | 0.002  | 0.019  | 270.179 | 0.013  | -0.016 |
| 101.153 | 0.106  | 0.085  | 200.092 | 0.021  | 0.022  | 271.072 | 0.011  | 0.016  |
| 101.171 | -0.012 | 0.003  | 200.098 | 0.017  | 0.032  | 271.107 | 0.006  | 0.022  |
| 101.177 | 0.056  | 0.017  | 200.11  | 0.000  | 0.008  | 271.113 | -0.007 | -0.003 |
| 101.183 | -0.001 | -0.001 | 200.116 | 0.037  | -0.066 | 271.121 | 0.024  | 0.043  |
| 101.195 | -0.012 | 0.003  | 200.123 | 0.038  | -0.041 | 271.128 | 0.005  | -0.017 |

|                |        |        |                |        |        |                |        |        |
|----------------|--------|--------|----------------|--------|--------|----------------|--------|--------|
| <b>101.201</b> | 0.039  | -0.055 | <b>200.133</b> | 0.049  | 0.048  | <b>271.134</b> | -0.010 | 0.021  |
| <b>101.206</b> | 0.041  | -0.024 | <b>200.139</b> | 0.025  | -0.008 | <b>271.157</b> | -0.002 | -0.068 |
| <b>101.227</b> | 0.016  | -0.011 | <b>200.151</b> | 0.048  | 0.023  | <b>271.162</b> | 0.034  | 0.009  |
| <b>102.04</b>  | 0.042  | -0.005 | <b>200.163</b> | -0.003 | -0.001 | <b>271.178</b> | 0.004  | 0.030  |
| <b>102.045</b> | 0.006  | -0.026 | <b>200.188</b> | 0.030  | 0.035  | <b>271.187</b> | 0.043  | 0.091  |
| <b>102.074</b> | 0.078  | 0.063  | <b>200.196</b> | 0.002  | -0.003 | <b>271.195</b> | 0.065  | -0.032 |
| <b>102.103</b> | -0.021 | 0.003  | <b>200.221</b> | 0.107  | 0.128  | <b>271.277</b> | 0.025  | 0.013  |
| <b>102.127</b> | 0.012  | 0.017  | <b>200.23</b>  | 0.009  | 0.011  | <b>271.287</b> | 0.018  | 0.010  |
| <b>102.133</b> | 0.002  | -0.003 | <b>200.254</b> | 0.010  | 0.003  | <b>271.307</b> | 0.024  | 0.070  |
| <b>102.15</b>  | 0.051  | 0.038  | <b>201.064</b> | -0.012 | 0.001  | <b>271.315</b> | 0.020  | -0.028 |
| <b>102.156</b> | 0.017  | 0.027  | <b>201.07</b>  | 0.042  | -0.037 | <b>271.326</b> | 0.012  | 0.017  |
| <b>103.023</b> | 0.098  | 0.082  | <b>201.075</b> | -0.016 | -0.004 | <b>271.336</b> | -0.002 | -0.026 |
| <b>103.028</b> | -0.004 | -0.004 | <b>201.084</b> | 0.008  | 0.033  | <b>271.345</b> | 0.025  | 0.073  |
| <b>103.058</b> | 0.122  | 0.046  | <b>201.102</b> | 0.009  | -0.010 | <b>271.354</b> | 0.010  | 0.006  |
| <b>103.121</b> | -0.012 | 0.005  | <b>201.11</b>  | 0.026  | 0.027  | <b>271.364</b> | 0.016  | 0.019  |
| <b>103.127</b> | 0.008  | -0.009 | <b>201.117</b> | 0.047  | 0.064  | <b>271.373</b> | 0.027  | -0.019 |
| <b>103.147</b> | 0.035  | -0.019 | <b>201.127</b> | 0.040  | -0.005 | <b>271.383</b> | 0.023  | 0.049  |
| <b>103.153</b> | 0.020  | 0.029  | <b>201.137</b> | 0.004  | 0.017  | <b>271.388</b> | 0.010  | 0.006  |
| <b>103.174</b> | 0.061  | 0.063  | <b>201.209</b> | 0.006  | 0.006  | <b>271.412</b> | -0.002 | -0.026 |
| <b>103.189</b> | -0.011 | -0.053 | <b>201.234</b> | 0.022  | 0.049  | <b>272.041</b> | 0.045  | -0.006 |
| <b>103.213</b> | -0.011 | -0.053 | <b>201.242</b> | -0.011 | -0.053 | <b>272.048</b> | 0.016  | 0.019  |
| <b>104.023</b> | 0.009  | -0.047 | <b>201.268</b> | 0.006  | -0.019 | <b>272.098</b> | -0.001 | 0.016  |
| <b>104.051</b> | 0.163  | 0.024  | <b>201.276</b> | 0.041  | 0.049  | <b>272.104</b> | -0.009 | -0.067 |
| <b>104.059</b> | -0.027 | 0.002  | <b>201.284</b> | 0.028  | 0.030  | <b>272.114</b> | 0.090  | 0.069  |
| <b>104.082</b> | 0.013  | -0.043 | <b>201.292</b> | 0.010  | 0.003  | <b>272.119</b> | 0.019  | 0.019  |
| <b>105.036</b> | 0.129  | 0.101  | <b>201.317</b> | 0.007  | 0.005  | <b>272.124</b> | 0.017  | 0.026  |
| <b>105.045</b> | -0.019 | -0.006 | <b>202.039</b> | 0.089  | 0.034  | <b>272.129</b> | 0.003  | 0.015  |
| <b>105.065</b> | 0.017  | 0.025  | <b>202.046</b> | 0.010  | -0.027 | <b>272.137</b> | 0.005  | -0.019 |
| <b>105.071</b> | 0.011  | 0.034  | <b>202.066</b> | 0.046  | 0.058  | <b>272.142</b> | 0.008  | -0.037 |
| <b>105.077</b> | 0.007  | 0.025  | <b>202.078</b> | -0.227 | 0.029  | <b>272.149</b> | 0.009  | -0.010 |
| <b>105.082</b> | -0.012 | 0.005  | <b>202.085</b> | 0.017  | 0.009  | <b>272.16</b>  | 0.023  | -0.024 |
| <b>105.113</b> | 0.009  | 0.009  | <b>202.091</b> | 0.095  | 0.058  | <b>272.165</b> | 0.010  | -0.010 |
| <b>105.125</b> | 0.072  | 0.081  | <b>202.102</b> | 0.014  | -0.013 | <b>272.179</b> | -0.013 | 0.001  |
| <b>105.137</b> | 0.009  | 0.009  | <b>202.107</b> | -0.001 | -0.088 | <b>272.185</b> | 0.047  | 0.059  |
| <b>105.142</b> | 0.010  | 0.010  | <b>202.113</b> | 0.012  | -0.020 | <b>272.195</b> | 0.031  | 0.037  |
| <b>105.149</b> | 0.021  | 0.019  | <b>202.118</b> | 0.008  | -0.015 | <b>272.203</b> | -0.006 | 0.000  |
| <b>106.019</b> | 0.006  | -0.060 | <b>202.124</b> | 0.043  | 0.052  | <b>272.213</b> | 0.006  | -0.004 |
| <b>106.025</b> | 0.076  | 0.070  | <b>202.136</b> | 0.051  | -0.004 | <b>272.242</b> | 0.003  | -0.009 |
| <b>106.03</b>  | 0.029  | 0.033  | <b>202.157</b> | 0.017  | 0.014  | <b>272.252</b> | -0.002 | -0.026 |
| <b>106.036</b> | 0.002  | -0.030 | <b>202.166</b> | -0.006 | -0.059 | <b>272.292</b> | 0.037  | 0.036  |
| <b>106.045</b> | 0.006  | -0.027 | <b>202.173</b> | 0.017  | 0.027  | <b>272.3</b>   | -0.005 | -0.038 |
| <b>106.064</b> | 0.083  | 0.029  | <b>202.19</b>  | -0.028 | 0.004  | <b>272.342</b> | 0.002  | -0.029 |
| <b>106.069</b> | 0.051  | 0.048  | <b>202.207</b> | 0.017  | 0.027  | <b>272.383</b> | -0.005 | -0.038 |
| <b>106.112</b> | 0.020  | 0.022  | <b>202.224</b> | 0.000  | -0.019 | <b>273.04</b>  | 0.010  | 0.014  |
| <b>107.049</b> | 0.078  | 0.110  | <b>202.265</b> | -0.038 | 0.010  | <b>273.047</b> | 0.014  | -0.054 |
| <b>107.054</b> | 0.025  | -0.061 | <b>202.282</b> | -0.012 | 0.004  | <b>273.052</b> | 0.012  | 0.035  |
| <b>107.1</b>   | 0.013  | -0.012 | <b>202.29</b>  | -0.060 | 0.005  | <b>273.094</b> | 0.012  | 0.024  |

|                |        |        |                |        |        |                |        |        |
|----------------|--------|--------|----------------|--------|--------|----------------|--------|--------|
| <b>108.035</b> | 0.010  | 0.003  | <b>202.332</b> | -0.016 | 0.000  | <b>273.102</b> | 0.012  | 0.021  |
| <b>108.044</b> | -0.035 | 0.008  | <b>203.073</b> | 0.028  | 0.022  | <b>273.121</b> | 0.006  | 0.015  |
| <b>108.049</b> | -0.042 | -0.050 | <b>203.078</b> | -0.114 | -0.104 | <b>273.13</b>  | 0.022  | 0.016  |
| <b>108.055</b> | 0.000  | -0.007 | <b>203.084</b> | 0.057  | 0.171  | <b>273.137</b> | 0.050  | 0.052  |
| <b>108.061</b> | 0.012  | 0.027  | <b>203.095</b> | 0.029  | -0.027 | <b>273.145</b> | -0.016 | -0.030 |
| <b>108.067</b> | 0.025  | 0.027  | <b>203.103</b> | 0.030  | -0.053 | <b>273.157</b> | 0.005  | 0.007  |
| <b>108.073</b> | 0.056  | 0.071  | <b>203.116</b> | 0.003  | -0.008 | <b>273.166</b> | 0.026  | 0.011  |
| <b>108.081</b> | -0.010 | -0.101 | <b>203.132</b> | 0.011  | -0.004 | <b>273.171</b> | 0.010  | 0.006  |
| <b>108.086</b> | 0.009  | 0.011  | <b>203.141</b> | -0.014 | -0.090 | <b>273.181</b> | -0.009 | -0.006 |
| <b>108.111</b> | 0.017  | 0.027  | <b>203.149</b> | 0.063  | 0.069  | <b>273.21</b>  | -0.012 | 0.004  |
| <b>109.035</b> | -0.011 | -0.053 | <b>203.156</b> | -0.016 | 0.000  | <b>273.224</b> | 0.001  | -0.011 |
| <b>109.044</b> | 0.100  | 0.081  | <b>203.166</b> | 0.006  | -0.002 | <b>273.229</b> | 0.017  | 0.025  |
| <b>109.052</b> | -0.003 | -0.044 | <b>203.182</b> | -0.016 | 0.002  | <b>273.258</b> | 0.015  | 0.015  |
| <b>109.063</b> | -0.011 | -0.053 | <b>203.19</b>  | -0.021 | -0.007 | <b>273.267</b> | 0.004  | -0.034 |
| <b>109.068</b> | 0.012  | 0.017  | <b>203.198</b> | -0.015 | 0.002  | <b>273.302</b> | 0.009  | 0.011  |
| <b>109.078</b> | 0.140  | 0.156  | <b>203.207</b> | -0.012 | 0.005  | <b>274.059</b> | 0.025  | -0.009 |
| <b>109.084</b> | -0.009 | -0.104 | <b>203.216</b> | -0.002 | -0.007 | <b>274.159</b> | 0.032  | 0.050  |
| <b>110.044</b> | 0.008  | -0.006 | <b>203.224</b> | -0.025 | 0.004  | <b>274.166</b> | 0.034  | -0.007 |
| <b>110.058</b> | -0.218 | 0.029  | <b>203.232</b> | -0.002 | -0.026 | <b>274.173</b> | 0.004  | -0.019 |
| <b>110.064</b> | 0.124  | 0.090  | <b>203.241</b> | -0.016 | 0.000  | <b>274.178</b> | 0.045  | -0.040 |
| <b>110.071</b> | 0.034  | 0.021  | <b>203.249</b> | 0.021  | -0.032 | <b>274.245</b> | 0.001  | -0.007 |
| <b>110.114</b> | 0.021  | 0.020  | <b>203.257</b> | 0.020  | 0.021  | <b>274.276</b> | 0.004  | -0.060 |
| <b>110.255</b> | -0.223 | 0.031  | <b>203.265</b> | -0.002 | -0.026 | <b>274.285</b> | -0.005 | -0.038 |
| <b>111.019</b> | 0.019  | 0.007  | <b>203.282</b> | 0.016  | 0.018  | <b>274.314</b> | 0.002  | -0.030 |
| <b>111.025</b> | 0.122  | 0.077  | <b>204.053</b> | 0.061  | 0.055  | <b>275.111</b> | 0.007  | -0.004 |
| <b>111.059</b> | -0.093 | 0.022  | <b>204.059</b> | 0.023  | -0.019 | <b>275.126</b> | -0.030 | 0.002  |
| <b>111.064</b> | -0.110 | 0.012  | <b>204.065</b> | 0.007  | -0.020 | <b>275.133</b> | -0.018 | 0.020  |
| <b>111.093</b> | 0.205  | -0.003 | <b>204.073</b> | -0.036 | 0.004  | <b>275.141</b> | -0.061 | 0.019  |
| <b>111.098</b> | 0.021  | -0.020 | <b>204.082</b> | 0.022  | 0.037  | <b>275.148</b> | -0.020 | -0.039 |
| <b>111.126</b> | 0.007  | -0.012 | <b>204.087</b> | -0.067 | 0.020  | <b>275.156</b> | 0.052  | -0.017 |
| <b>111.152</b> | -0.022 | 0.000  | <b>204.093</b> | -0.011 | 0.062  | <b>275.162</b> | 0.073  | 0.051  |
| <b>111.157</b> | -0.016 | 0.012  | <b>204.099</b> | -0.013 | 0.002  | <b>275.174</b> | 0.013  | 0.034  |
| <b>111.163</b> | -0.124 | 0.014  | <b>204.104</b> | 0.114  | -0.013 | <b>275.197</b> | -0.015 | 0.003  |
| <b>111.176</b> | -0.048 | 0.012  | <b>204.11</b>  | 0.022  | -0.050 | <b>276.059</b> | 0.048  | 0.027  |
| <b>111.185</b> | -0.151 | 0.031  | <b>204.118</b> | -0.002 | -0.026 | <b>276.066</b> | 0.012  | 0.024  |
| <b>111.191</b> | -0.047 | 0.000  | <b>204.126</b> | -0.027 | 0.005  | <b>276.1</b>   | -0.012 | 0.005  |
| <b>111.213</b> | -0.075 | 0.016  | <b>204.151</b> | 0.026  | 0.017  | <b>276.116</b> | -0.002 | -0.026 |
| <b>111.243</b> | -0.059 | 0.012  | <b>204.181</b> | 0.019  | 0.020  | <b>276.122</b> | 0.006  | -0.033 |
| <b>111.249</b> | -0.042 | 0.002  | <b>204.218</b> | 0.040  | 0.045  | <b>276.134</b> | 0.078  | 0.125  |
| <b>112.052</b> | 0.034  | 0.019  | <b>204.243</b> | 0.017  | 0.027  | <b>276.143</b> | 0.016  | -0.059 |
| <b>112.058</b> | 0.150  | 0.114  | <b>204.248</b> | 0.019  | 0.023  | <b>276.148</b> | -0.040 | 0.009  |
| <b>112.063</b> | -0.181 | 0.022  | <b>205.036</b> | 0.006  | 0.006  | <b>276.156</b> | 0.065  | 0.040  |
| <b>112.069</b> | -0.050 | 0.011  | <b>205.061</b> | 0.005  | -0.005 | <b>276.166</b> | 0.013  | -0.019 |
| <b>112.076</b> | 0.007  | -0.005 | <b>205.087</b> | 0.021  | 0.036  | <b>276.227</b> | 0.010  | 0.012  |
| <b>112.092</b> | 0.173  | 0.055  | <b>205.094</b> | 0.067  | 0.028  | <b>277.09</b>  | 0.010  | 0.012  |
| <b>112.097</b> | -0.005 | -0.038 | <b>205.102</b> | 0.004  | -0.008 | <b>277.103</b> | 0.003  | -0.009 |
| <b>112.141</b> | -0.007 | -0.002 | <b>205.132</b> | 0.014  | -0.019 | <b>277.115</b> | 0.006  | -0.031 |

|         |        |        |         |        |        |         |        |        |
|---------|--------|--------|---------|--------|--------|---------|--------|--------|
| 112.147 | 0.007  | 0.015  | 205.14  | -0.007 | -0.004 | 277.129 | 0.007  | -0.002 |
| 112.153 | 0.015  | 0.013  | 205.148 | 0.004  | -0.008 | 277.135 | 0.039  | 0.018  |
| 112.171 | 0.009  | 0.003  | 205.165 | -0.014 | 0.002  | 277.143 | -0.062 | -0.017 |
| 113.041 | 0.158  | 0.095  | 205.173 | 0.003  | -0.003 | 277.151 | 0.054  | 0.088  |
| 113.048 | -0.012 | 0.005  | 205.223 | 0.010  | 0.003  | 277.156 | -0.007 | -0.005 |
| 113.072 | 0.057  | 0.049  | 205.249 | 0.022  | 0.033  | 277.161 | -0.012 | 0.005  |
| 113.078 | 0.056  | 0.009  | 205.256 | 0.010  | 0.003  | 277.192 | 0.014  | 0.010  |
| 113.104 | -0.018 | -0.013 | 205.287 | 0.053  | 0.029  | 277.222 | -0.002 | -0.026 |
| 113.11  | 0.083  | 0.027  | 205.294 | 0.022  | 0.023  | 277.231 | 0.012  | 0.017  |
| 113.12  | -0.011 | -0.003 | 205.32  | 0.007  | 0.005  | 277.262 | -0.002 | -0.026 |
| 113.141 | -0.023 | 0.015  | 206.065 | 0.019  | 0.060  | 277.27  | 0.054  | 0.022  |
| 113.147 | 0.012  | -0.017 | 206.073 | 0.025  | 0.026  | 277.305 | 0.037  | 0.037  |
| 113.163 | -0.028 | 0.003  | 206.079 | -0.028 | 0.034  | 278.062 | -0.011 | -0.053 |
| 113.172 | 0.050  | 0.036  | 206.085 | -0.088 | 0.006  | 278.114 | 0.019  | 0.036  |
| 113.191 | 0.006  | -0.002 | 206.091 | 0.036  | -0.030 | 278.122 | 0.059  | 0.047  |
| 113.197 | 0.026  | 0.009  | 206.096 | 0.013  | -0.021 | 278.128 | 0.010  | 0.010  |
| 113.222 | 0.031  | -0.010 | 206.106 | 0.011  | 0.031  | 278.134 | 0.027  | 0.009  |
| 113.228 | 0.002  | -0.025 | 206.114 | 0.013  | -0.011 | 278.14  | 0.008  | -0.006 |
| 113.246 | 0.011  | 0.016  | 206.122 | 0.020  | 0.008  | 278.145 | -0.002 | -0.077 |
| 113.254 | 0.006  | 0.006  | 206.139 | -0.013 | 0.001  | 278.151 | 0.012  | 0.035  |
| 114.031 | 0.013  | 0.008  | 206.172 | 0.011  | 0.016  | 278.157 | 0.006  | 0.006  |
| 114.071 | 0.129  | 0.060  | 206.211 | 0.043  | 0.050  | 278.173 | 0.017  | 0.027  |
| 114.127 | -0.001 | -0.015 | 207.045 | 0.018  | 0.016  | 278.178 | 0.010  | 0.006  |
| 114.14  | -0.012 | 0.003  | 207.05  | 0.009  | 0.003  | 278.207 | 0.009  | 0.009  |
| 114.146 | 0.027  | -0.018 | 207.101 | -0.024 | 0.035  | 278.216 | 0.006  | -0.002 |
| 114.152 | 0.005  | -0.009 | 207.108 | 0.099  | 0.010  | 278.227 | 0.019  | 0.006  |
| 114.158 | -0.028 | 0.010  | 207.115 | 0.003  | -0.009 | 278.236 | 0.010  | 0.014  |
| 114.165 | -0.009 | -0.004 | 207.216 | -0.006 | -0.006 | 279.092 | 0.097  | 0.043  |
| 114.171 | 0.021  | -0.007 | 207.229 | -0.016 | 0.001  | 279.097 | -0.006 | -0.031 |
| 114.177 | 0.008  | -0.041 | 207.25  | 0.000  | 0.001  | 279.146 | -0.012 | -0.025 |
| 114.19  | 0.005  | -0.005 | 207.28  | -0.007 | -0.001 | 279.175 | -0.013 | 0.001  |
| 114.199 | 0.015  | -0.045 | 207.292 | 0.010  | 0.014  | 279.214 | -0.013 | 0.001  |
| 114.227 | 0.045  | 0.040  | 208.053 | 0.010  | 0.006  | 279.234 | -0.029 | 0.004  |
| 115.021 | 0.046  | 0.050  | 208.096 | 0.025  | 0.065  | 279.253 | 0.001  | -0.007 |
| 115.056 | 0.041  | -0.084 | 208.105 | 0.014  | 0.144  | 279.263 | 0.009  | -0.001 |
| 115.062 | 0.127  | 0.137  | 208.112 | -0.003 | -0.101 | 279.273 | -0.026 | 0.041  |
| 115.074 | 0.040  | -0.051 | 208.124 | 0.086  | -0.116 | 279.308 | -0.025 | -0.005 |
| 115.079 | -0.023 | 0.005  | 208.133 | 0.004  | -0.008 | 280.095 | 0.074  | 0.081  |
| 115.089 | -0.052 | -0.093 | 208.153 | -0.015 | 0.002  | 280.101 | -0.059 | -0.002 |
| 115.143 | -0.025 | -0.008 | 208.195 | -0.002 | -0.026 | 280.106 | 0.039  | -0.022 |
| 115.148 | 0.131  | 0.062  | 208.204 | 0.003  | -0.009 | 280.117 | -0.001 | -0.045 |
| 115.168 | -0.027 | -0.007 | 208.221 | 0.013  | -0.021 | 280.164 | -0.006 | 0.009  |
| 115.174 | 0.143  | 0.059  | 208.229 | 0.023  | 0.008  | 280.174 | 0.022  | -0.004 |
| 115.18  | -0.013 | 0.002  | 208.242 | 0.056  | 0.032  | 280.179 | 0.015  | 0.012  |
| 115.193 | 0.005  | -0.009 | 208.25  | 0.067  | -0.053 | 280.199 | 0.007  | -0.024 |
| 115.199 | 0.007  | -0.072 | 208.263 | 0.009  | 0.011  | 280.222 | 0.008  | -0.012 |
| 115.205 | 0.012  | 0.004  | 208.272 | 0.011  | -0.001 | 281.109 | -0.046 | -0.024 |



|         |        |        |         |        |        |         |        |        |
|---------|--------|--------|---------|--------|--------|---------|--------|--------|
| 115.224 | -0.015 | -0.061 | 208.28  | 0.028  | -0.048 | 281.116 | 0.002  | 0.043  |
| 115.23  | 0.009  | 0.009  | 208.288 | 0.043  | -0.055 | 281.124 | -0.010 | 0.022  |
| 115.237 | 0.012  | 0.002  | 208.301 | 0.003  | -0.002 | 281.129 | 0.049  | 0.068  |
| 115.25  | 0.040  | 0.021  | 208.314 | 0.005  | -0.009 | 281.137 | 0.037  | 0.008  |
| 116.05  | 0.020  | -0.080 | 208.322 | 0.007  | -0.004 | 281.144 | 0.006  | -0.047 |
| 116.084 | 0.131  | 0.030  | 209.063 | 0.005  | -0.047 | 281.152 | 0.025  | 0.010  |
| 116.144 | 0.021  | 0.027  | 209.069 | -0.012 | 0.004  | 281.158 | 0.009  | -0.010 |
| 116.156 | -0.015 | 0.003  | 209.082 | -0.041 | -0.012 | 281.164 | 0.002  | -0.003 |
| 116.169 | 0.024  | 0.039  | 209.09  | 0.059  | 0.157  | 281.179 | -0.001 | -0.016 |
| 116.175 | -0.006 | -0.014 | 209.096 | 0.023  | -0.023 | 281.243 | 0.027  | 0.024  |
| 116.181 | -0.008 | -0.005 | 209.104 | 0.027  | -0.077 | 281.258 | 0.018  | 0.006  |
| 116.188 | -0.013 | 0.000  | 209.11  | 0.003  | -0.008 | 282.092 | 0.041  | 0.033  |
| 116.206 | -0.015 | 0.003  | 209.119 | 0.013  | -0.022 | 282.098 | -0.055 | -0.050 |
| 116.213 | -0.008 | -0.005 | 209.135 | 0.021  | 0.004  | 282.108 | -0.078 | 0.088  |
| 116.242 | 0.050  | 0.019  | 209.143 | -0.016 | -0.082 | 282.113 | -0.006 | 0.049  |
| 117.036 | 0.075  | 0.168  | 209.169 | -0.016 | -0.026 | 282.123 | -0.005 | -0.038 |
| 117.071 | 0.112  | 0.097  | 209.176 | 0.010  | -0.004 | 282.129 | 0.012  | 0.024  |
| 117.076 | -0.003 | -0.044 | 209.21  | 0.003  | -0.028 | 282.136 | 0.011  | 0.016  |
| 117.133 | -0.016 | 0.000  | 209.249 | 0.007  | 0.010  | 282.158 | 0.010  | 0.003  |
| 117.156 | -0.002 | -0.026 | 209.995 | 0.012  | 0.017  | 282.167 | 0.009  | 0.003  |
| 117.162 | 0.021  | 0.002  | 210.006 | 0.007  | 0.010  | 282.181 | 0.017  | 0.016  |
| 117.167 | 0.122  | 0.085  | 210.012 | 0.012  | 0.017  | 282.187 | 0.010  | 0.010  |
| 117.177 | 0.007  | -0.005 | 210.035 | 0.010  | 0.003  | 282.201 | 0.025  | 0.037  |
| 117.188 | 0.030  | -0.002 | 210.041 | 0.009  | 0.011  | 282.216 | -0.005 | -0.038 |
| 117.193 | 0.146  | 0.085  | 210.051 | 0.021  | 0.000  | 283.089 | 0.026  | -0.017 |
| 117.219 | 0.086  | 0.081  | 210.058 | 0.024  | 0.003  | 283.094 | 0.014  | 0.027  |
| 117.225 | 0.006  | 0.006  | 210.068 | 0.040  | 0.045  | 283.1   | 0.003  | -0.021 |
| 117.237 | -0.011 | -0.053 | 210.077 | 0.045  | 0.030  | 283.106 | -0.006 | 0.014  |
| 117.244 | 0.012  | 0.017  | 210.085 | 0.008  | 0.003  | 283.118 | -0.046 | 0.009  |
| 118.098 | 0.092  | -0.072 | 210.092 | -0.002 | -0.026 | 283.125 | -0.012 | 0.005  |
| 118.184 | -0.016 | 0.000  | 210.098 | 0.009  | -0.004 | 283.132 | -0.017 | 0.076  |
| 118.261 | 0.007  | -0.009 | 210.104 | 0.002  | -0.030 | 283.138 | 0.018  | 0.034  |
| 118.28  | -0.026 | 0.002  | 210.11  | 0.020  | 0.042  | 283.148 | -0.011 | -0.056 |
| 118.386 | 0.017  | -0.008 | 210.126 | 0.021  | 0.011  | 283.153 | 0.042  | 0.041  |
| 118.411 | 0.092  | -0.085 | 210.143 | 0.085  | 0.107  | 283.159 | 0.007  | 0.005  |
| 118.416 | 0.008  | 0.035  | 210.151 | 0.038  | 0.045  | 283.172 | 0.009  | -0.042 |
| 118.461 | 0.094  | -0.068 | 210.16  | 0.006  | -0.001 | 283.177 | 0.009  | 0.002  |
| 118.487 | 0.052  | -0.050 | 210.177 | 0.025  | 0.024  | 283.186 | 0.006  | 0.010  |
| 118.672 | 0.005  | -0.007 | 210.185 | 0.019  | -0.004 | 283.195 | 0.022  | 0.026  |
| 118.825 | 0.004  | -0.008 | 210.193 | -0.002 | -0.026 | 283.211 | -0.013 | 0.011  |
| 118.875 | 0.011  | -0.021 | 210.211 | 0.009  | 0.011  | 283.216 | -0.013 | 0.001  |
| 119.01  | 0.009  | 0.011  | 210.224 | -0.002 | -0.026 | 283.221 | -0.015 | 0.010  |
| 119.047 | -0.054 | -0.013 | 211.003 | 0.019  | 0.021  | 283.23  | 0.022  | 0.043  |
| 119.054 | -0.015 | 0.002  | 211.019 | 0.002  | -0.030 | 283.259 | -0.002 | 0.016  |
| 119.099 | 0.088  | -0.057 | 211.027 | 0.006  | 0.006  | 283.27  | -0.006 | -0.048 |
| 119.192 | -0.016 | 0.000  | 211.04  | -0.012 | 0.003  | 284.081 | 0.012  | 0.024  |
| 119.199 | -0.038 | 0.034  | 211.053 | 0.014  | 0.039  | 284.1   | 0.027  | 0.015  |

|         |        |        |         |        |        |         |        |        |
|---------|--------|--------|---------|--------|--------|---------|--------|--------|
| 119.205 | 0.106  | -0.051 | 211.06  | 0.012  | 0.004  | 284.113 | 0.046  | 0.073  |
| 119.224 | -0.039 | 0.008  | 211.068 | 0.008  | -0.017 | 284.119 | 0.006  | -0.002 |
| 119.23  | 0.100  | -0.051 | 211.074 | 0.003  | 0.011  | 284.132 | 0.005  | -0.057 |
| 119.25  | -0.015 | 0.003  | 211.084 | 0.015  | -0.036 | 284.143 | 0.014  | -0.030 |
| 119.256 | 0.116  | -0.018 | 211.091 | 0.036  | 0.054  | 284.152 | 0.035  | 0.040  |
| 119.275 | -0.016 | 0.001  | 211.097 | -0.025 | 0.004  | 284.16  | 0.003  | -0.009 |
| 119.281 | -0.016 | 0.000  | 211.102 | -0.068 | 0.100  | 284.174 | 0.043  | 0.058  |
| 119.287 | 0.044  | -0.031 | 211.112 | 0.026  | -0.054 | 284.182 | 0.016  | -0.001 |
| 119.294 | -0.021 | 0.000  | 211.117 | 0.017  | -0.013 | 284.192 | 0.042  | 0.055  |
| 119.31  | 0.016  | 0.049  | 211.137 | 0.003  | -0.009 | 284.217 | 0.007  | 0.010  |
| 119.316 | -0.012 | 0.005  | 211.146 | -0.004 | -0.010 | 284.227 | 0.020  | 0.020  |
| 119.339 | 0.082  | 0.027  | 211.154 | 0.003  | -0.002 | 284.256 | -0.006 | -0.059 |
| 119.348 | 0.015  | -0.022 | 211.163 | -0.014 | 0.002  | 284.262 | 0.010  | 0.006  |
| 119.362 | 0.007  | 0.005  | 211.172 | 0.012  | 0.017  | 284.275 | 0.012  | 0.017  |
| 119.367 | 0.051  | -0.020 | 211.189 | 0.040  | 0.042  | 284.305 | 0.007  | 0.005  |
| 119.397 | 0.021  | -0.030 | 211.196 | 0.004  | 0.006  | 285.104 | 0.015  | 0.004  |
| 119.403 | 0.021  | 0.017  | 211.231 | 0.046  | 0.016  | 285.115 | 0.029  | 0.039  |
| 119.412 | 0.081  | -0.022 | 211.239 | 0.045  | 0.046  | 285.124 | -0.011 | -0.029 |
| 119.422 | 0.009  | -0.054 | 211.265 | 0.038  | 0.036  | 285.133 | -0.005 | -0.029 |
| 119.435 | 0.006  | -0.007 | 211.274 | 0.023  | -0.047 | 285.14  | 0.023  | 0.014  |
| 119.441 | 0.031  | 0.007  | 212.024 | -0.002 | -0.026 | 285.147 | 0.005  | 0.031  |
| 119.983 | 0.024  | -0.015 | 212.029 | 0.002  | -0.030 | 285.154 | 0.025  | -0.026 |
| 119.992 | 0.085  | 0.057  | 212.044 | 0.004  | -0.034 | 285.165 | -0.001 | 0.065  |
| 120.041 | 0.131  | -0.077 | 212.054 | 0.013  | 0.005  | 285.172 | 0.005  | 0.042  |
| 120.047 | 0.042  | 0.078  | 212.066 | 0.006  | -0.014 | 285.18  | -0.010 | 0.010  |
| 120.076 | 0.025  | -0.044 | 212.077 | 0.028  | 0.020  | 285.188 | 0.010  | -0.023 |
| 120.082 | 0.007  | 0.005  | 212.082 | 0.036  | 0.024  | 285.195 | 0.031  | -0.002 |
| 120.093 | 0.075  | 0.073  | 212.091 | 0.047  | 0.047  | 285.204 | 0.036  | -0.028 |
| 120.099 | 0.006  | -0.050 | 212.1   | 0.013  | -0.032 | 286.007 | 0.006  | -0.002 |
| 120.104 | 0.031  | -0.049 | 212.105 | -0.016 | 0.000  | 286.111 | 0.004  | 0.009  |
| 120.156 | 0.033  | 0.037  | 212.114 | -0.015 | 0.007  | 286.117 | 0.032  | 0.031  |
| 120.162 | 0.024  | -0.019 | 212.134 | 0.026  | -0.030 | 286.123 | 0.000  | 0.009  |
| 120.188 | 0.001  | -0.007 | 212.143 | 0.079  | -0.025 | 286.129 | 0.045  | 0.039  |
| 121.062 | 0.078  | -0.056 | 212.151 | 0.019  | 0.029  | 286.136 | 0.018  | 0.022  |
| 121.253 | 0.010  | -0.015 | 212.159 | -0.017 | -0.053 | 286.141 | 0.003  | -0.003 |
| 121.279 | -0.011 | -0.051 | 212.19  | -0.002 | -0.026 | 286.148 | -0.003 | 0.011  |
| 121.301 | 0.020  | -0.094 | 213.027 | 0.052  | 0.056  | 286.156 | 0.006  | -0.019 |
| 121.33  | -0.023 | -0.047 | 213.046 | 0.009  | 0.011  | 286.162 | 0.019  | -0.050 |
| 121.335 | 0.127  | -0.012 | 213.056 | 0.012  | 0.024  | 286.169 | 0.011  | -0.024 |
| 121.343 | 0.006  | 0.006  | 213.065 | 0.018  | 0.030  | 286.175 | 0.013  | -0.011 |
| 121.35  | 0.019  | -0.002 | 213.082 | -0.199 | 0.026  | 286.18  | 0.019  | -0.030 |
| 121.362 | 0.072  | -0.075 | 213.095 | 0.020  | 0.016  | 286.195 | 0.010  | 0.006  |
| 121.368 | -0.006 | -0.003 | 213.105 | 0.005  | -0.072 | 286.204 | 0.025  | 0.011  |
| 121.482 | 0.010  | 0.014  | 213.115 | 0.015  | 0.009  | 286.214 | -0.013 | 0.001  |
| 122.018 | 0.012  | 0.017  | 213.124 | 0.051  | 0.025  | 286.244 | 0.020  | 0.041  |
| 122.024 | 0.006  | 0.032  | 213.133 | 0.089  | 0.111  | 287.14  | 0.020  | 0.012  |
| 122.066 | 0.086  | -0.039 | 213.142 | 0.067  | -0.095 | 287.148 | 0.086  | 0.007  |

|         |        |        |         |        |        |         |        |        |
|---------|--------|--------|---------|--------|--------|---------|--------|--------|
| 122.092 | -0.016 | 0.001  | 213.15  | 0.018  | -0.015 | 287.156 | 0.015  | -0.041 |
| 122.15  | 0.004  | -0.008 | 213.167 | 0.023  | 0.008  | 287.251 | -0.001 | 0.018  |
| 122.157 | -0.013 | 0.001  | 213.223 | 0.010  | 0.008  | 287.265 | 0.003  | -0.031 |
| 122.163 | 0.043  | 0.001  | 213.253 | -0.013 | 0.000  | 287.35  | 0.012  | 0.024  |
| 122.169 | 0.036  | 0.030  | 213.261 | -0.037 | 0.013  | 288.041 | 0.019  | 0.016  |
| 122.176 | 0.016  | -0.004 | 214.033 | 0.018  | 0.018  | 288.133 | 0.041  | -0.083 |
| 122.189 | 0.025  | -0.002 | 214.04  | 0.106  | 0.069  | 288.141 | 0.059  | 0.144  |
| 122.195 | 0.022  | 0.047  | 214.048 | -0.036 | -0.003 | 288.148 | -0.007 | 0.010  |
| 123.02  | 0.025  | -0.011 | 214.065 | -0.027 | 0.002  | 288.157 | 0.017  | -0.071 |
| 123.026 | 0.047  | 0.004  | 214.074 | -0.013 | -0.004 | 288.166 | -0.003 | -0.010 |
| 123.058 | 0.010  | 0.003  | 214.083 | -0.046 | -0.027 | 288.183 | 0.007  | -0.008 |
| 123.093 | 0.052  | -0.020 | 214.092 | -0.061 | -0.003 | 288.19  | 0.011  | -0.009 |
| 123.181 | 0.018  | 0.037  | 214.105 | 0.047  | 0.045  | 288.214 | 0.086  | 0.017  |
| 123.207 | -0.016 | -0.008 | 214.113 | 0.089  | 0.024  | 288.22  | 0.005  | -0.014 |
| 123.213 | 0.022  | 0.006  | 214.118 | 0.020  | -0.039 | 288.229 | 0.018  | -0.038 |
| 124.068 | 0.036  | 0.023  | 214.126 | 0.031  | -0.036 | 288.249 | 0.006  | -0.018 |
| 124.074 | 0.070  | -0.012 | 214.143 | 0.006  | -0.007 | 288.258 | 0.003  | -0.008 |
| 124.083 | 0.027  | -0.016 | 214.152 | -0.029 | 0.027  | 288.269 | 0.011  | 0.016  |
| 124.092 | -0.016 | -0.009 | 214.16  | 0.004  | 0.011  | 288.288 | 0.008  | -0.017 |
| 124.099 | 0.010  | -0.005 | 214.168 | -0.024 | 0.006  | 288.298 | 0.028  | -0.029 |
| 124.124 | 0.002  | -0.030 | 214.177 | 0.013  | -0.016 | 288.308 | 0.010  | 0.012  |
| 125.033 | 0.068  | 0.030  | 214.185 | -0.024 | 0.006  | 288.318 | 0.009  | 0.003  |
| 125.04  | -0.002 | -0.026 | 214.194 | -0.009 | 0.001  | 288.327 | 0.012  | 0.017  |
| 125.063 | 0.007  | 0.014  | 214.202 | -0.026 | 0.011  | 288.338 | -0.001 | -0.037 |
| 125.072 | 0.127  | 0.043  | 214.211 | 0.007  | -0.005 | 289.134 | -0.003 | -0.045 |
| 125.079 | -0.002 | -0.026 | 214.229 | 0.003  | -0.002 | 289.143 | 0.037  | 0.027  |
| 125.105 | -0.002 | -0.014 | 214.237 | 0.026  | 0.028  | 289.15  | 0.056  | 0.002  |
| 125.122 | -0.013 | 0.001  | 214.246 | 0.079  | 0.008  | 289.158 | -0.045 | 0.024  |
| 125.138 | 0.021  | 0.045  | 214.254 | 0.006  | 0.019  | 289.163 | 0.023  | 0.036  |
| 125.144 | 0.006  | 0.006  | 214.263 | 0.010  | 0.010  | 289.173 | 0.003  | -0.008 |
| 126.027 | -0.011 | -0.053 | 214.28  | 0.007  | 0.005  | 289.214 | 0.012  | 0.035  |
| 126.034 | 0.026  | 0.030  | 214.285 | 0.012  | 0.024  | 289.234 | -0.013 | 0.001  |
| 126.053 | -0.222 | 0.034  | 215.04  | 0.011  | 0.004  | 289.254 | 0.074  | 0.055  |
| 126.067 | 0.140  | 0.084  | 215.048 | 0.017  | -0.005 | 289.274 | 0.010  | 0.010  |
| 126.073 | 0.007  | -0.005 | 215.055 | 0.012  | -0.034 | 289.284 | 0.007  | 0.010  |
| 126.102 | -0.003 | 0.008  | 215.096 | 0.032  | 0.039  | 289.294 | 0.059  | 0.052  |
| 126.109 | -0.009 | -0.080 | 215.105 | 0.053  | 0.133  | 289.299 | 0.000  | -0.051 |
| 127.009 | 0.010  | -0.007 | 215.113 | -0.002 | -0.056 | 289.334 | 0.010  | 0.010  |
| 127.015 | 0.027  | 0.049  | 215.121 | -0.007 | -0.063 | 289.342 | 0.012  | 0.017  |
| 127.02  | -0.005 | -0.038 | 215.146 | 0.006  | -0.007 | 289.375 | 0.007  | 0.005  |
| 127.048 | 0.051  | 0.065  | 215.155 | -0.010 | -0.003 | 289.388 | 0.009  | 0.009  |
| 127.055 | 0.012  | 0.009  | 215.173 | 0.005  | -0.009 | 290.056 | 0.017  | 0.027  |
| 127.085 | 0.134  | 0.070  | 215.18  | 0.012  | 0.002  | 290.066 | 0.000  | -0.035 |
| 127.09  | -0.017 | -0.004 | 215.212 | 0.003  | -0.009 | 290.141 | 0.029  | 0.034  |
| 127.117 | 0.090  | 0.057  | 215.22  | -0.005 | -0.001 | 290.146 | 0.009  | 0.011  |
| 127.124 | -0.016 | -0.013 | 215.25  | 0.006  | -0.002 | 290.158 | 0.027  | 0.026  |
| 127.143 | 0.003  | -0.008 | 216.029 | 0.010  | 0.006  | 290.167 | 0.011  | -0.048 |

|         |        |        |         |        |        |         |        |        |
|---------|--------|--------|---------|--------|--------|---------|--------|--------|
| 127.156 | -0.008 | -0.006 | 216.037 | -0.001 | -0.044 | 290.172 | 0.045  | 0.044  |
| 127.17  | -0.026 | 0.003  | 216.046 | 0.039  | 0.035  | 290.181 | 0.003  | -0.017 |
| 127.177 | -0.016 | 0.000  | 216.052 | 0.007  | 0.005  | 290.19  | 0.059  | -0.075 |
| 127.183 | 0.021  | -0.002 | 216.06  | 0.021  | 0.018  | 290.196 | 0.019  | -0.029 |
| 127.189 | 0.026  | 0.029  | 216.067 | 0.010  | 0.006  | 290.21  | 0.012  | 0.017  |
| 127.196 | -0.010 | -0.002 | 216.076 | 0.011  | -0.022 | 290.241 | 0.010  | 0.014  |
| 127.21  | 0.003  | -0.008 | 216.084 | 0.011  | 0.016  | 290.256 | 0.003  | -0.009 |
| 127.216 | 0.029  | 0.037  | 216.09  | 0.021  | 0.023  | 290.296 | -0.002 | -0.026 |
| 127.25  | 0.040  | 0.074  | 216.095 | 0.009  | 0.009  | 291.15  | -0.014 | 0.004  |
| 128.041 | 0.000  | -0.033 | 216.106 | 0.003  | -0.051 | 291.159 | 0.056  | -0.011 |
| 128.047 | 0.009  | 0.011  | 216.111 | 0.020  | 0.012  | 291.168 | 0.009  | 0.032  |
| 128.082 | 0.131  | 0.001  | 216.118 | 0.014  | 0.017  | 291.176 | -0.001 | 0.039  |
| 128.135 | -0.015 | 0.003  | 216.125 | 0.064  | 0.078  | 291.181 | 0.003  | -0.018 |
| 128.149 | -0.014 | 0.000  | 216.136 | 0.029  | -0.062 | 291.188 | 0.028  | -0.041 |
| 128.155 | -0.025 | 0.001  | 216.148 | 0.038  | 0.056  | 291.193 | 0.031  | -0.003 |
| 128.162 | 0.044  | 0.060  | 216.157 | -0.015 | 0.002  | 291.203 | 0.007  | -0.014 |
| 128.169 | 0.005  | -0.009 | 216.17  | 0.034  | 0.006  | 291.259 | -0.012 | 0.003  |
| 128.182 | 0.001  | -0.016 | 216.178 | 0.010  | 0.003  | 291.288 | 0.002  | -0.042 |
| 128.189 | 0.054  | 0.025  | 216.204 | 0.022  | 0.012  | 291.344 | 0.012  | 0.017  |
| 128.195 | 0.005  | -0.009 | 216.217 | -0.005 | -0.038 | 292.064 | -0.002 | -0.026 |
| 128.202 | 0.010  | 0.014  | 217.054 | 0.003  | -0.014 | 292.122 | 0.009  | 0.003  |
| 128.219 | 0.009  | 0.004  | 217.06  | 0.009  | -0.008 | 292.139 | 0.036  | 0.009  |
| 129.03  | -0.015 | -0.005 | 217.067 | 0.018  | -0.008 | 292.147 | 0.044  | 0.059  |
| 129.039 | -0.013 | 0.002  | 217.126 | 0.106  | -0.073 | 292.152 | -0.002 | -0.026 |
| 129.06  | -0.026 | 0.002  | 217.261 | -0.068 | 0.007  | 292.157 | 0.042  | 0.026  |
| 129.066 | 0.108  | 0.112  | 217.273 | 0.130  | -0.041 | 292.163 | 0.013  | 0.006  |
| 129.072 | -0.017 | -0.001 | 217.283 | -0.015 | 0.003  | 292.17  | 0.012  | -0.008 |
| 129.081 | 0.034  | 0.054  | 217.29  | 0.003  | -0.009 | 292.178 | 0.015  | -0.012 |
| 129.088 | -0.025 | -0.064 | 217.298 | -0.066 | 0.012  | 293.135 | 0.007  | 0.005  |
| 129.095 | 0.037  | -0.062 | 217.307 | 0.103  | -0.045 | 293.146 | 0.011  | 0.001  |
| 129.101 | 0.108  | 0.091  | 217.334 | -0.048 | 0.009  | 293.155 | 0.007  | 0.063  |
| 129.158 | -0.014 | 0.004  | 217.342 | 0.133  | -0.080 | 293.161 | -0.002 | 0.030  |
| 129.164 | 0.002  | -0.003 | 217.377 | -0.011 | -0.004 | 293.211 | 0.008  | 0.003  |
| 129.191 | 0.044  | 0.049  | 217.385 | 0.111  | -0.084 | 293.221 | 0.007  | 0.012  |
| 129.198 | 0.008  | -0.004 | 217.393 | 0.009  | 0.009  | 293.231 | -0.013 | 0.001  |
| 129.225 | 0.129  | 0.092  | 217.411 | 0.016  | -0.019 | 293.266 | 0.018  | 0.023  |
| 129.231 | 0.006  | -0.002 | 217.416 | 0.039  | -0.006 | 294.065 | 0.003  | -0.009 |
| 129.245 | 0.023  | 0.023  | 217.452 | 0.035  | -0.044 | 294.078 | 0.008  | -0.015 |
| 130.063 | 0.171  | 0.049  | 217.459 | 0.005  | -0.009 | 294.098 | 0.046  | 0.055  |
| 130.068 | -0.009 | -0.013 | 217.486 | 0.025  | -0.025 | 294.105 | 0.017  | 0.013  |
| 130.08  | -0.015 | 0.003  | 217.493 | 0.025  | -0.031 | 294.113 | 0.018  | 0.030  |
| 130.092 | 0.047  | 0.034  | 217.498 | 0.013  | -0.018 | 294.122 | -0.005 | -0.078 |
| 130.098 | 0.062  | -0.016 | 217.532 | 0.016  | -0.022 | 294.13  | 0.061  | 0.094  |
| 130.104 | 0.019  | -0.022 | 217.546 | 0.038  | -0.044 | 294.149 | 0.002  | -0.027 |
| 130.125 | 0.007  | -0.008 | 217.551 | 0.020  | 0.007  | 294.159 | 0.010  | 0.010  |
| 130.132 | 0.005  | -0.005 | 217.558 | 0.014  | -0.018 | 294.175 | 0.010  | -0.008 |
| 130.138 | 0.008  | -0.028 | 217.567 | 0.021  | -0.029 | 294.184 | 0.017  | 0.012  |

|         |        |        |         |        |        |         |        |        |
|---------|--------|--------|---------|--------|--------|---------|--------|--------|
| 130.158 | 0.020  | 0.012  | 217.584 | 0.020  | -0.025 | 294.198 | 0.028  | 0.042  |
| 130.164 | 0.028  | 0.009  | 217.592 | 0.006  | -0.011 | 294.205 | 0.019  | 0.028  |
| 131.066 | 0.088  | 0.157  | 217.6   | 0.005  | -0.009 | 294.214 | 0.010  | 0.012  |
| 131.072 | -0.021 | -0.092 | 217.623 | 0.006  | -0.011 | 295.116 | 0.010  | 0.012  |
| 131.136 | 0.002  | -0.003 | 218.027 | 0.020  | 0.018  | 295.125 | -0.015 | 0.009  |
| 131.142 | -0.006 | -0.071 | 218.035 | 0.014  | -0.009 | 295.133 | 0.034  | 0.001  |
| 131.149 | 0.020  | 0.035  | 218.045 | 0.007  | -0.004 | 295.14  | -0.007 | 0.033  |
| 131.162 | 0.010  | -0.006 | 218.053 | 0.020  | -0.015 | 295.147 | -0.002 | -0.050 |
| 131.169 | -0.016 | -0.054 | 218.062 | -0.008 | 0.010  | 295.152 | 0.039  | 0.046  |
| 131.176 | 0.010  | 0.037  | 218.073 | -0.041 | 0.009  | 295.199 | -0.015 | 0.003  |
| 131.182 | 0.010  | -0.013 | 218.081 | -0.016 | 0.000  | 295.23  | -0.011 | -0.053 |
| 131.189 | 0.002  | -0.003 | 218.119 | 0.014  | 0.028  | 295.24  | -0.005 | -0.038 |
| 131.196 | -0.029 | 0.003  | 218.126 | 0.074  | -0.015 | 295.261 | 0.012  | 0.017  |
| 131.209 | 0.012  | 0.017  | 218.134 | 0.033  | -0.057 | 296.11  | 0.013  | 0.015  |
| 131.253 | 0.010  | 0.010  | 219.042 | -0.012 | 0.005  | 296.119 | 0.083  | 0.037  |
| 132.04  | 0.039  | 0.013  | 219.052 | 0.003  | -0.009 | 296.129 | 0.032  | -0.042 |
| 132.067 | 0.022  | 0.000  | 219.061 | 0.005  | -0.005 | 296.137 | 0.000  | 0.025  |
| 132.072 | 0.107  | 0.029  | 219.072 | 0.055  | 0.017  | 296.143 | 0.006  | -0.007 |
| 132.078 | 0.001  | 0.002  | 219.078 | 0.018  | 0.027  | 296.177 | 0.007  | 0.010  |
| 132.142 | 0.012  | 0.017  | 219.09  | 0.007  | -0.011 | 296.182 | -0.002 | -0.026 |
| 133.031 | 0.014  | 0.039  | 219.103 | -0.007 | 0.018  | 296.222 | 0.012  | 0.017  |
| 133.058 | 0.114  | 0.075  | 219.115 | -0.011 | 0.056  | 297.008 | -0.012 | 0.005  |
| 133.065 | 0.007  | -0.028 | 219.125 | 0.075  | -0.048 | 297.014 | 0.019  | -0.007 |
| 133.074 | 0.021  | -0.031 | 219.133 | 0.038  | 0.032  | 297.076 | 0.000  | -0.049 |
| 133.08  | -0.016 | 0.018  | 219.141 | 0.009  | 0.003  | 297.084 | -0.075 | -0.003 |
| 133.087 | 0.015  | 0.015  | 219.15  | -0.012 | 0.004  | 297.091 | -0.143 | 0.053  |
| 133.093 | 0.015  | 0.027  | 219.194 | 0.005  | 0.016  | 297.096 | 0.029  | 0.048  |
| 133.1   | -0.014 | 0.002  | 219.202 | -0.004 | -0.014 | 297.103 | 0.038  | 0.017  |
| 133.127 | -0.014 | 0.002  | 219.21  | 0.012  | -0.005 | 297.113 | 0.041  | 0.022  |
| 133.147 | -0.012 | 0.003  | 219.219 | -0.012 | 0.005  | 297.136 | 0.012  | 0.017  |
| 133.154 | 0.016  | 0.012  | 219.228 | 0.007  | -0.009 | 297.155 | 0.003  | -0.009 |
| 133.161 | 0.006  | 0.006  | 219.237 | -0.011 | -0.053 | 297.167 | -0.033 | 0.011  |
| 133.167 | 0.033  | -0.037 | 219.246 | 0.023  | 0.059  | 297.176 | -0.012 | -0.023 |
| 133.174 | 0.011  | -0.014 | 219.258 | 0.007  | -0.009 | 297.186 | -0.017 | 0.050  |
| 133.181 | 0.012  | 0.017  | 219.271 | -0.011 | -0.053 | 297.195 | 0.050  | 0.035  |
| 133.198 | 0.022  | 0.037  | 219.288 | 0.004  | -0.027 | 297.2   | -0.025 | 0.022  |
| 134.048 | 0.102  | 0.070  | 220.041 | 0.009  | 0.003  | 297.206 | 0.006  | 0.005  |
| 134.055 | 0.038  | 0.033  | 220.048 | 0.104  | 0.089  | 297.215 | 0.019  | 0.022  |
| 134.072 | 0.043  | 0.006  | 220.053 | -0.006 | -0.038 | 297.235 | 0.039  | 0.054  |
| 134.079 | -0.039 | -0.002 | 220.058 | 0.017  | 0.017  | 297.245 | 0.002  | 0.019  |
| 134.085 | 0.059  | -0.039 | 220.067 | 0.007  | 0.010  | 297.255 | 0.012  | 0.024  |
| 134.092 | 0.056  | 0.055  | 220.079 | 0.017  | 0.027  | 297.266 | 0.009  | 0.011  |
| 134.121 | 0.015  | 0.011  | 220.087 | 0.010  | 0.003  | 297.276 | 0.054  | 0.029  |
| 134.149 | 0.026  | 0.023  | 220.126 | -0.133 | 0.014  | 297.286 | 0.007  | 0.029  |
| 134.156 | 0.010  | 0.010  | 220.136 | 0.087  | -0.054 | 297.295 | 0.012  | 0.024  |
| 134.163 | 0.021  | 0.018  | 220.235 | -0.013 | 0.000  | 298.086 | -0.015 | 0.002  |
| 134.169 | 0.024  | 0.039  | 220.252 | 0.010  | 0.003  | 298.092 | -0.067 | -0.026 |

|         |        |        |         |        |        |         |        |        |
|---------|--------|--------|---------|--------|--------|---------|--------|--------|
| 134.196 | 0.014  | 0.039  | 220.27  | 0.014  | -0.034 | 298.1   | -0.027 | 0.004  |
| 135.07  | 0.086  | -0.015 | 220.278 | 0.013  | 0.008  | 298.112 | 0.010  | 0.010  |
| 135.075 | 0.007  | -0.009 | 220.287 | 0.044  | -0.009 | 298.123 | 0.032  | 0.036  |
| 135.134 | -0.023 | -0.003 | 220.3   | 0.070  | -0.063 | 298.128 | 0.019  | 0.012  |
| 135.161 | -0.008 | -0.005 | 220.305 | 0.010  | 0.006  | 298.134 | 0.021  | 0.030  |
| 135.181 | 0.010  | 0.012  | 220.313 | 0.017  | 0.007  | 298.143 | -0.011 | -0.053 |
| 135.993 | 0.132  | 0.042  | 220.322 | 0.047  | 0.077  | 298.158 | 0.019  | 0.022  |
| 136.027 | -0.012 | 0.003  | 220.331 | 0.029  | 0.020  | 298.176 | 0.002  | -0.030 |
| 136.041 | -0.016 | 0.001  | 220.339 | 0.010  | -0.032 | 298.185 | -0.005 | -0.038 |
| 136.062 | 0.029  | 0.056  | 220.347 | 0.011  | 0.016  | 298.245 | 0.010  | 0.014  |
| 136.068 | 0.019  | 0.076  | 220.382 | 0.005  | -0.009 | 299.054 | 0.019  | 0.003  |
| 136.075 | 0.017  | 0.027  | 220.387 | 0.003  | -0.002 | 299.07  | -0.004 | -0.041 |
| 136.089 | -0.010 | -0.026 | 221.085 | -0.014 | 0.002  | 299.088 | -0.013 | 0.001  |
| 136.094 | -0.010 | 0.001  | 221.094 | 0.068  | 0.047  | 299.1   | 0.011  | 0.032  |
| 136.103 | 0.144  | -0.034 | 221.101 | 0.010  | 0.051  | 299.138 | -0.002 | -0.026 |
| 136.109 | 0.005  | -0.001 | 221.112 | -0.006 | 0.019  | 299.183 | -0.005 | -0.038 |
| 136.123 | -0.016 | 0.001  | 221.119 | 0.003  | -0.031 | 299.196 | -0.020 | -0.042 |
| 136.13  | 0.003  | 0.026  | 221.125 | 0.018  | -0.022 | 299.205 | 0.019  | 0.053  |
| 136.15  | -0.016 | 0.001  | 221.134 | 0.021  | -0.044 | 299.213 | 0.057  | 0.089  |
| 136.157 | 0.002  | 0.027  | 221.14  | 0.050  | -0.014 | 299.222 | 0.056  | -0.024 |
| 136.171 | -0.012 | 0.005  | 221.148 | -0.003 | -0.009 | 299.309 | 0.021  | 0.038  |
| 136.184 | 0.043  | 0.084  | 221.156 | -0.069 | 0.014  | 300.065 | 0.007  | 0.010  |
| 136.191 | 0.007  | -0.009 | 221.166 | -0.017 | -0.001 | 300.106 | 0.019  | 0.021  |
| 136.198 | 0.007  | -0.005 | 221.192 | -0.046 | 0.003  | 300.115 | 0.003  | -0.009 |
| 136.212 | 0.128  | 0.081  | 221.218 | -0.013 | 0.001  | 300.122 | 0.010  | 0.012  |
| 136.218 | 0.037  | -0.062 | 221.227 | 0.001  | -0.045 | 300.13  | 0.026  | 0.008  |
| 136.239 | 0.027  | 0.005  | 221.235 | 0.004  | 0.004  | 300.138 | 0.007  | 0.010  |
| 137     | 0.050  | 0.058  | 221.244 | -0.006 | -0.026 | 300.166 | -0.002 | -0.044 |
| 137.007 | -0.002 | -0.050 | 221.262 | 0.051  | 0.017  | 300.175 | 0.020  | -0.001 |
| 137.022 | 0.088  | 0.062  | 221.27  | -0.002 | -0.080 | 300.186 | 0.011  | -0.005 |
| 137.027 | -0.023 | -0.003 | 221.297 | 0.009  | 0.003  | 300.191 | 0.020  | 0.033  |
| 137.033 | 0.069  | 0.048  | 221.304 | -0.011 | -0.053 | 300.197 | 0.017  | 0.018  |
| 137.041 | 0.004  | -0.008 | 222.055 | 0.011  | 0.016  | 300.206 | 0.022  | 0.032  |
| 137.061 | -0.027 | -0.082 | 222.061 | 0.015  | 0.035  | 300.213 | 0.046  | 0.007  |
| 137.067 | 0.116  | 0.098  | 222.069 | 0.008  | -0.004 | 300.235 | 0.019  | 0.028  |
| 137.09  | 0.000  | -0.012 | 222.074 | -0.012 | 0.004  | 300.251 | 0.002  | -0.030 |
| 137.096 | -0.008 | -0.034 | 222.082 | -0.006 | -0.031 | 301.112 | 0.009  | 0.003  |
| 137.101 | 0.106  | 0.085  | 222.09  | 0.037  | 0.057  | 301.141 | 0.006  | -0.061 |
| 137.107 | 0.006  | -0.022 | 222.097 | 0.033  | -0.025 | 301.149 | 0.035  | 0.052  |
| 137.171 | 0.004  | -0.024 | 222.105 | 0.017  | 0.067  | 301.154 | 0.015  | 0.007  |
| 137.984 | 0.010  | -0.044 | 222.112 | -0.013 | 0.017  | 301.16  | 0.014  | 0.051  |
| 137.991 | 0.069  | 0.098  | 222.118 | 0.003  | -0.003 | 301.165 | 0.034  | 0.039  |
| 137.997 | 0.034  | 0.024  | 222.134 | 0.001  | -0.009 | 301.172 | 0.003  | -0.002 |
| 138.04  | -0.016 | 0.001  | 222.141 | 0.015  | -0.011 | 301.179 | -0.010 | -0.004 |
| 138.083 | 0.085  | -0.095 | 222.148 | 0.010  | -0.020 | 301.191 | 0.009  | 0.003  |
| 138.194 | 0.012  | 0.045  | 222.155 | 0.065  | 0.061  | 301.256 | 0.017  | 0.027  |
| 138.2   | 0.007  | 0.010  | 222.164 | -0.077 | -0.040 | 302.141 | 0.007  | 0.005  |

|         |        |        |         |        |        |         |        |        |
|---------|--------|--------|---------|--------|--------|---------|--------|--------|
| 138.225 | -0.016 | 0.001  | 222.261 | -0.011 | -0.053 | 302.148 | 0.010  | 0.006  |
| 138.26  | 0.006  | 0.006  | 222.277 | -0.005 | -0.038 | 302.156 | 0.007  | 0.010  |
| 138.393 | 0.004  | -0.014 | 223.042 | 0.191  | -0.016 | 302.162 | 0.016  | 0.029  |
| 138.407 | 0.007  | -0.045 | 223.048 | -0.045 | 0.009  | 302.169 | 0.056  | -0.051 |
| 138.438 | 0.013  | -0.017 | 223.066 | -0.048 | 0.014  | 302.174 | 0.033  | 0.064  |
| 139.012 | 0.034  | 0.032  | 223.074 | -0.062 | 0.001  | 302.184 | -0.040 | -0.004 |
| 139.045 | 0.037  | 0.026  | 223.086 | -0.015 | 0.022  | 302.197 | 0.010  | -0.014 |
| 139.083 | 0.070  | -0.051 | 223.095 | 0.046  | 0.049  | 302.234 | 0.012  | 0.035  |
| 139.117 | 0.020  | 0.028  | 223.103 | 0.020  | 0.029  | 302.254 | 0.010  | 0.014  |
| 139.145 | -0.027 | 0.002  | 223.112 | 0.013  | -0.062 | 302.259 | 0.010  | 0.012  |
| 139.151 | -0.015 | 0.007  | 223.12  | 0.003  | -0.008 | 302.268 | 0.012  | 0.017  |
| 139.172 | 0.019  | 0.010  | 223.138 | -0.013 | 0.002  | 302.274 | 0.014  | -0.018 |
| 139.179 | -0.028 | 0.007  | 223.147 | 0.002  | -0.003 | 302.311 | 0.017  | 0.027  |
| 139.186 | -0.025 | 0.009  | 223.155 | 0.007  | -0.016 | 303.121 | -0.011 | -0.001 |
| 139.2   | 0.046  | -0.005 | 223.19  | 0.004  | -0.024 | 303.138 | 0.030  | 0.043  |
| 139.207 | 0.103  | 0.004  | 223.225 | -0.012 | -0.007 | 303.148 | 0.073  | 0.047  |
| 139.214 | -0.014 | 0.004  | 224.045 | 0.005  | -0.036 | 303.154 | -0.035 | -0.024 |
| 139.222 | 0.010  | -0.023 | 224.051 | 0.028  | -0.032 | 303.164 | -0.043 | 0.003  |
| 139.228 | 0.033  | 0.018  | 224.059 | 0.092  | 0.075  | 303.17  | 0.014  | -0.014 |
| 139.234 | 0.059  | -0.041 | 224.064 | 0.048  | 0.067  | 303.175 | 0.007  | -0.004 |
| 139.256 | 0.029  | -0.017 | 224.073 | -0.026 | 0.002  | 303.181 | 0.007  | -0.005 |
| 139.262 | 0.078  | -0.013 | 224.078 | -0.066 | 0.007  | 303.262 | 0.010  | 0.012  |
| 140.048 | 0.017  | 0.027  | 224.085 | -0.047 | 0.014  | 304.127 | -0.012 | 0.005  |
| 140.069 | 0.010  | 0.006  | 224.093 | -0.026 | -0.080 | 304.14  | -0.002 | -0.026 |
| 140.08  | 0.078  | 0.122  | 224.101 | 0.002  | -0.017 | 304.147 | 0.041  | 0.051  |
| 140.086 | 0.053  | -0.129 | 224.111 | -0.019 | 0.004  | 304.158 | 0.043  | -0.058 |
| 140.092 | 0.005  | -0.014 | 224.119 | 0.044  | 0.020  | 304.164 | 0.021  | 0.071  |
| 140.12  | 0.117  | 0.102  | 224.127 | 0.078  | 0.037  | 304.17  | 0.028  | 0.028  |
| 140.127 | 0.004  | -0.008 | 224.137 | 0.035  | 0.016  | 304.179 | 0.076  | -0.086 |
| 141.02  | 0.018  | 0.023  | 224.145 | 0.006  | -0.002 | 304.231 | 0.003  | -0.009 |
| 141.027 | 0.003  | -0.058 | 224.154 | 0.005  | -0.005 | 304.269 | 0.012  | 0.024  |
| 141.055 | -0.013 | 0.000  | 224.159 | -0.040 | 0.004  | 305.125 | 0.022  | 0.020  |
| 141.096 | 0.046  | -0.021 | 224.176 | -0.030 | 0.004  | 305.13  | 0.018  | -0.025 |
| 141.162 | -0.015 | 0.002  | 224.188 | 0.005  | -0.005 | 305.138 | 0.004  | -0.038 |
| 141.19  | -0.004 | -0.024 | 224.198 | 0.013  | -0.016 | 305.144 | 0.015  | 0.026  |
| 141.197 | -0.057 | 0.003  | 224.215 | 0.022  | 0.037  | 305.155 | 0.004  | 0.064  |
| 141.204 | 0.012  | 0.027  | 224.224 | 0.019  | 0.029  | 305.162 | 0.017  | -0.011 |
| 141.211 | 0.006  | 0.006  | 224.232 | 0.019  | -0.010 | 305.172 | 0.029  | -0.036 |
| 141.218 | 0.030  | -0.035 | 224.241 | -0.010 | -0.070 | 305.177 | 0.007  | -0.009 |
| 141.225 | -0.030 | -0.052 | 224.25  | 0.017  | 0.027  | 305.186 | 0.006  | -0.007 |
| 141.232 | -0.024 | 0.018  | 224.259 | 0.021  | 0.035  | 305.213 | 0.012  | 0.035  |
| 141.238 | 0.006  | 0.006  | 224.268 | 0.008  | -0.040 | 305.234 | 0.002  | -0.030 |
| 141.266 | -0.020 | 0.020  | 224.303 | 0.009  | 0.003  | 306.079 | -0.012 | 0.003  |
| 142.051 | 0.011  | -0.030 | 225.003 | 0.043  | 0.026  | 306.115 | -0.013 | 0.001  |
| 142.059 | 0.098  | 0.098  | 225.014 | 0.009  | 0.009  | 306.125 | -0.012 | 0.004  |
| 142.065 | -0.012 | 0.004  | 225.07  | 0.023  | 0.035  | 306.132 | -0.007 | 0.014  |
| 142.093 | 0.014  | -0.067 | 225.075 | 0.011  | 0.013  | 306.14  | 0.021  | 0.008  |

|         |        |        |         |        |        |         |        |        |
|---------|--------|--------|---------|--------|--------|---------|--------|--------|
| 142.099 | 0.055  | 0.044  | 225.085 | -0.051 | 0.002  | 306.146 | 0.017  | 0.010  |
| 142.124 | -0.006 | 0.007  | 225.093 | -0.003 | 0.027  | 306.153 | 0.027  | 0.008  |
| 142.13  | 0.003  | 0.017  | 225.099 | -0.048 | -0.011 | 306.163 | 0.040  | 0.008  |
| 142.158 | 0.005  | -0.009 | 225.104 | 0.069  | 0.025  | 306.176 | 0.015  | 0.029  |
| 142.187 | 0.002  | -0.003 | 225.113 | 0.013  | -0.019 | 306.182 | -0.007 | -0.009 |
| 143.009 | 0.012  | 0.017  | 225.12  | 0.030  | 0.035  | 306.196 | 0.006  | -0.007 |
| 143.075 | 0.146  | 0.111  | 225.129 | 0.013  | 0.001  | 306.227 | 0.006  | -0.002 |
| 143.08  | -0.011 | -0.014 | 225.137 | -0.022 | 0.005  | 306.233 | 0.009  | 0.009  |
| 143.109 | 0.023  | 0.022  | 225.145 | 0.009  | -0.009 | 307.123 | 0.003  | 0.012  |
| 143.148 | -0.012 | 0.005  | 225.155 | 0.017  | 0.000  | 307.132 | 0.020  | 0.030  |
| 143.179 | 0.006  | -0.002 | 225.163 | -0.009 | 0.025  | 307.139 | 0.017  | -0.002 |
| 143.207 | 0.035  | 0.037  | 225.172 | -0.015 | -0.054 | 307.145 | -0.027 | 0.004  |
| 143.214 | 0.107  | 0.078  | 225.181 | 0.008  | -0.004 | 307.153 | 0.045  | -0.025 |
| 143.221 | 0.009  | 0.009  | 225.19  | -0.009 | 0.009  | 307.16  | 0.018  | 0.024  |
| 143.235 | 0.012  | -0.003 | 225.198 | -0.005 | 0.001  | 307.168 | 0.020  | 0.040  |
| 143.243 | 0.046  | 0.076  | 225.233 | 0.003  | -0.009 | 307.191 | -0.035 | 0.012  |
| 143.264 | 0.050  | 0.040  | 225.26  | 0.017  | 0.027  | 307.262 | 0.009  | 0.011  |
| 143.271 | 0.039  | 0.040  | 226.048 | 0.010  | 0.003  | 307.273 | 0.007  | 0.010  |
| 143.299 | 0.019  | 0.026  | 226.053 | 0.010  | 0.014  | 308.034 | 0.006  | -0.002 |
| 143.33  | 0.010  | 0.012  | 226.062 | 0.062  | 0.038  | 308.1   | 0.012  | 0.035  |
| 144.026 | 0.002  | -0.030 | 226.07  | 0.022  | -0.005 | 308.121 | -0.002 | -0.026 |
| 144.033 | -0.003 | -0.039 | 226.079 | 0.014  | -0.014 | 308.138 | 0.010  | 0.014  |
| 144.039 | 0.007  | -0.018 | 226.084 | 0.026  | 0.062  | 308.148 | 0.031  | -0.004 |
| 144.075 | 0.140  | 0.055  | 226.095 | 0.010  | 0.014  | 308.154 | 0.031  | 0.000  |
| 144.081 | 0.005  | -0.009 | 226.105 | 0.010  | 0.003  | 308.16  | 0.059  | 0.088  |
| 144.106 | 0.069  | 0.061  | 226.114 | 0.023  | 0.022  | 308.168 | 0.004  | -0.049 |
| 144.112 | 0.054  | -0.018 | 226.126 | 0.034  | 0.005  | 308.174 | 0.008  | -0.032 |
| 144.134 | 0.005  | -0.009 | 226.139 | 0.021  | 0.023  | 308.181 | 0.049  | -0.004 |
| 144.141 | 0.026  | 0.002  | 226.157 | 0.039  | -0.054 | 308.189 | 0.006  | -0.007 |
| 144.148 | 0.006  | -0.011 | 226.174 | 0.012  | 0.017  | 308.208 | -0.002 | -0.026 |
| 144.169 | 0.020  | 0.009  | 226.192 | -0.001 | -0.069 | 308.249 | -0.011 | -0.053 |
| 144.175 | 0.021  | 0.013  | 226.197 | 0.041  | 0.012  | 308.259 | 0.010  | 0.003  |
| 144.183 | 0.021  | 0.021  | 226.219 | 0.010  | 0.014  | 309.063 | 0.010  | 0.012  |
| 144.197 | 0.017  | 0.015  | 226.236 | 0.010  | 0.010  | 309.141 | 0.018  | -0.002 |
| 144.208 | 0.025  | 0.022  | 227.044 | 0.006  | 0.006  | 309.152 | -0.005 | 0.021  |
| 145.051 | 0.023  | 0.008  | 227.052 | 0.022  | 0.023  | 309.159 | 0.000  | 0.001  |
| 145.061 | -0.016 | 0.000  | 227.06  | 0.003  | -0.009 | 309.166 | 0.007  | 0.061  |
| 145.089 | 0.119  | 0.138  | 227.072 | -0.011 | -0.053 | 309.173 | 0.001  | 0.014  |
| 145.095 | -0.004 | -0.121 | 227.079 | 0.007  | 0.053  | 309.227 | 0.017  | 0.027  |
| 145.161 | -0.015 | 0.007  | 227.085 | -0.064 | -0.008 | 309.268 | 0.005  | -0.027 |
| 145.169 | 0.018  | -0.007 | 227.091 | -0.072 | 0.012  | 310.062 | 0.006  | -0.002 |
| 145.176 | -0.008 | -0.003 | 227.097 | 0.006  | 0.025  | 310.067 | 0.018  | 0.016  |
| 145.183 | 0.018  | -0.008 | 227.105 | 0.041  | 0.032  | 310.074 | -0.007 | -0.069 |
| 145.19  | 0.023  | 0.023  | 227.112 | 0.022  | 0.015  | 310.085 | 0.020  | 0.025  |
| 145.197 | 0.051  | 0.005  | 227.122 | 0.028  | 0.023  | 310.106 | 0.007  | -0.020 |
| 145.204 | 0.010  | -0.008 | 227.134 | -0.006 | -0.043 | 310.116 | 0.035  | 0.033  |
| 145.211 | 0.034  | 0.012  | 227.141 | 0.020  | 0.025  | 310.124 | 0.006  | 0.006  |



|         |        |        |         |        |        |         |        |        |
|---------|--------|--------|---------|--------|--------|---------|--------|--------|
| 145.219 | 0.009  | -0.018 | 227.149 | 0.024  | -0.028 | 310.133 | 0.025  | 0.030  |
| 145.226 | 0.030  | -0.046 | 227.158 | 0.014  | -0.066 | 310.143 | 0.027  | 0.044  |
| 145.232 | 0.029  | 0.019  | 227.171 | 0.029  | 0.065  | 310.149 | -0.030 | -0.042 |
| 145.239 | 0.120  | 0.124  | 227.18  | 0.003  | 0.006  | 310.16  | 0.000  | 0.015  |
| 145.247 | 0.006  | -0.011 | 227.255 | 0.009  | 0.003  | 310.176 | 0.029  | 0.029  |
| 145.257 | -0.002 | -0.026 | 228.007 | 0.025  | 0.024  | 311.073 | 0.010  | 0.010  |
| 146.05  | 0.130  | 0.048  | 228.012 | 0.058  | 0.055  | 311.092 | 0.019  | 0.024  |
| 146.059 | 0.004  | 0.006  | 228.02  | -0.011 | -0.053 | 311.097 | 0.015  | 0.015  |
| 146.075 | 0.023  | 0.017  | 228.026 | 0.014  | 0.017  | 311.107 | 0.021  | 0.003  |
| 146.084 | 0.019  | -0.044 | 228.035 | 0.007  | -0.033 | 311.117 | 0.074  | 0.096  |
| 146.09  | 0.124  | 0.050  | 228.045 | 0.025  | 0.000  | 311.127 | -0.017 | -0.079 |
| 146.116 | 0.008  | 0.023  | 228.057 | 0.015  | 0.059  | 311.135 | 0.008  | 0.023  |
| 146.122 | -0.007 | -0.044 | 228.079 | 0.020  | 0.028  | 311.156 | 0.014  | -0.026 |
| 146.136 | 0.003  | -0.009 | 228.084 | 0.010  | 0.006  | 311.166 | 0.018  | 0.016  |
| 146.144 | 0.032  | 0.003  | 228.092 | 0.019  | 0.013  | 311.186 | 0.010  | 0.006  |
| 146.151 | 0.009  | 0.009  | 228.097 | 0.026  | 0.015  | 311.206 | 0.058  | 0.097  |
| 146.158 | 0.010  | -0.022 | 228.105 | 0.007  | -0.034 | 311.222 | 0.012  | 0.017  |
| 146.173 | 0.007  | -0.005 | 228.11  | 0.018  | 0.042  | 311.227 | 0.010  | 0.006  |
| 146.179 | 0.009  | 0.009  | 228.118 | 0.026  | 0.028  | 311.238 | 0.003  | -0.009 |
| 147.042 | -0.026 | 0.002  | 228.125 | 0.001  | -0.006 | 311.248 | 0.022  | 0.048  |
| 147.057 | 0.109  | 0.092  | 228.134 | 0.020  | 0.017  | 311.258 | -0.011 | -0.053 |
| 147.063 | 0.016  | -0.008 | 228.143 | 0.032  | -0.024 | 312.116 | 0.010  | -0.053 |
| 147.071 | -0.061 | -0.002 | 228.152 | 0.014  | -0.014 | 312.127 | 0.037  | 0.025  |
| 147.081 | 0.018  | -0.014 | 228.161 | -0.008 | -0.031 | 312.133 | 0.014  | -0.015 |
| 147.087 | 0.011  | -0.021 | 228.169 | 0.028  | 0.061  | 312.138 | 0.028  | 0.036  |
| 147.092 | 0.003  | -0.008 | 228.178 | 0.031  | -0.030 | 312.149 | 0.012  | 0.017  |
| 147.101 | -0.028 | -0.004 | 228.188 | 0.006  | -0.004 | 312.155 | 0.026  | 0.035  |
| 147.108 | 0.032  | -0.048 | 228.196 | -0.005 | -0.038 | 312.205 | 0.009  | 0.009  |
| 147.179 | 0.007  | 0.005  | 228.204 | 0.010  | 0.014  | 312.21  | 0.010  | 0.014  |
| 148.062 | 0.086  | 0.011  | 228.231 | 0.014  | 0.039  | 313.067 | 0.029  | 0.025  |
| 148.067 | 0.009  | 0.025  | 228.24  | 0.009  | 0.009  | 313.075 | 0.043  | 0.053  |
| 148.097 | 0.007  | -0.009 | 229.043 | 0.020  | -0.033 | 313.082 | 0.011  | 0.004  |
| 148.133 | 0.029  | -0.091 | 229.048 | 0.012  | 0.024  | 313.096 | 0.011  | -0.084 |
| 148.154 | 0.012  | 0.017  | 229.064 | -0.015 | 0.007  | 313.104 | 0.020  | 0.045  |
| 148.161 | 0.012  | 0.035  | 229.07  | -0.013 | 0.001  | 313.111 | 0.007  | 0.010  |
| 148.19  | 0.016  | 0.030  | 229.076 | 0.011  | 0.012  | 313.142 | -0.001 | 0.039  |
| 148.211 | 0.018  | 0.031  | 229.083 | -0.003 | 0.006  | 313.157 | 0.012  | 0.024  |
| 148.217 | 0.012  | 0.035  | 229.096 | 0.009  | 0.025  | 313.162 | 0.010  | 0.003  |
| 149.052 | -0.229 | 0.031  | 229.101 | 0.004  | 0.001  | 313.167 | 0.012  | 0.035  |
| 149.074 | 0.121  | 0.122  | 229.109 | -0.026 | -0.002 | 313.173 | 0.022  | 0.007  |
| 149.08  | 0.005  | -0.040 | 229.115 | 0.001  | -0.019 | 313.179 | 0.006  | -0.002 |
| 149.086 | 0.084  | -0.117 | 229.121 | -0.012 | 0.005  | 313.188 | 0.021  | 0.052  |
| 149.118 | 0.008  | 0.008  | 229.127 | 0.015  | -0.044 | 313.194 | -0.011 | -0.053 |
| 149.189 | -0.018 | 0.021  | 229.132 | 0.007  | -0.009 | 313.203 | -0.007 | -0.038 |
| 149.196 | -0.074 | -0.012 | 229.137 | 0.079  | 0.085  | 313.213 | 0.027  | 0.026  |
| 149.225 | -0.015 | -0.033 | 229.144 | -0.040 | -0.008 | 313.22  | 0.010  | 0.014  |
| 150.039 | 0.004  | -0.008 | 229.149 | 0.021  | 0.020  | 313.228 | 0.009  | 0.003  |

|         |        |        |         |        |        |         |        |        |
|---------|--------|--------|---------|--------|--------|---------|--------|--------|
| 150.046 | 0.024  | 0.044  | 229.156 | 0.025  | 0.020  | 313.234 | 0.019  | -0.009 |
| 150.054 | -0.172 | 0.022  | 229.223 | 0.006  | -0.012 | 314.11  | 0.031  | 0.046  |
| 150.065 | 0.050  | 0.035  | 229.241 | 0.019  | 0.027  | 314.117 | -0.015 | 0.007  |
| 150.072 | 0.037  | 0.012  | 229.249 | 0.019  | 0.018  | 314.126 | 0.028  | 0.032  |
| 150.077 | -0.002 | -0.044 | 229.258 | 0.007  | 0.005  | 314.134 | 0.010  | 0.014  |
| 150.084 | 0.008  | -0.021 | 229.271 | 0.014  | 0.039  | 314.139 | -0.002 | -0.050 |
| 150.089 | 0.012  | -0.017 | 229.303 | 0.007  | 0.005  | 314.148 | 0.002  | -0.061 |
| 150.095 | 0.015  | -0.021 | 230.024 | 0.021  | 0.024  | 314.159 | 0.003  | -0.009 |
| 150.106 | 0.009  | 0.009  | 230.03  | 0.047  | -0.039 | 314.164 | 0.017  | 0.024  |
| 150.113 | -0.001 | 0.045  | 230.036 | 0.039  | 0.033  | 314.171 | 0.010  | 0.006  |
| 150.141 | 0.004  | 0.037  | 230.072 | 0.009  | 0.011  | 314.211 | 0.010  | 0.003  |
| 150.148 | -0.010 | -0.003 | 230.081 | 0.005  | 0.037  | 314.232 | 0.006  | -0.024 |
| 150.174 | 0.011  | 0.016  | 230.096 | 0.021  | 0.027  | 315.11  | 0.012  | -0.012 |
| 151.066 | -0.022 | 0.130  | 230.104 | 0.071  | -0.030 | 315.116 | 0.010  | 0.010  |
| 151.075 | 0.069  | -0.109 | 230.111 | 0.022  | 0.036  | 315.121 | 0.021  | 0.021  |
| 151.118 | 0.003  | -0.009 | 230.128 | 0.015  | 0.033  | 315.129 | 0.015  | 0.001  |
| 151.148 | -0.002 | -0.026 | 230.134 | -0.002 | -0.005 | 315.142 | 0.004  | -0.036 |
| 151.155 | -0.013 | 0.000  | 230.139 | 0.013  | -0.014 | 315.15  | 0.033  | 0.044  |
| 151.162 | 0.002  | 0.006  | 230.146 | 0.026  | 0.039  | 315.161 | 0.026  | -0.010 |
| 151.169 | 0.025  | 0.021  | 230.155 | 0.057  | 0.015  | 315.169 | 0.032  | 0.061  |
| 151.177 | -0.002 | -0.026 | 230.164 | 0.072  | 0.046  | 315.175 | 0.012  | 0.017  |
| 151.184 | 0.003  | 0.022  | 230.19  | 0.021  | 0.018  | 315.186 | 0.002  | 0.020  |
| 151.191 | 0.042  | 0.071  | 230.199 | 0.039  | 0.029  | 315.192 | 0.007  | 0.010  |
| 151.198 | -0.003 | -0.004 | 230.235 | 0.009  | 0.009  | 315.202 | 0.011  | -0.022 |
| 151.205 | -0.013 | -0.077 | 230.243 | 0.007  | 0.005  | 315.207 | 0.006  | -0.002 |
| 151.22  | 0.007  | 0.010  | 230.279 | 0.015  | 0.002  | 315.212 | 0.001  | -0.038 |
| 151.231 | 0.007  | -0.039 | 231.054 | 0.027  | 0.038  | 316.096 | 0.005  | -0.020 |
| 151.981 | 0.006  | 0.006  | 231.06  | 0.050  | -0.009 | 316.114 | 0.009  | 0.009  |
| 152.045 | 0.009  | -0.017 | 231.068 | 0.007  | 0.010  | 316.135 | 0.010  | 0.014  |
| 152.058 | -0.041 | 0.032  | 231.082 | 0.038  | -0.005 | 316.185 | 0.025  | -0.007 |
| 152.067 | -0.012 | 0.005  | 231.092 | -0.012 | 0.016  | 316.191 | 0.009  | 0.003  |
| 152.084 | -0.060 | 0.065  | 231.098 | 0.002  | 0.016  | 316.198 | 0.030  | 0.076  |
| 152.092 | 0.080  | -0.105 | 231.107 | -0.021 | -0.032 | 316.208 | 0.067  | -0.101 |
| 152.098 | 0.021  | 0.000  | 231.116 | 0.014  | 0.013  | 316.214 | 0.032  | -0.018 |
| 152.157 | 0.018  | 0.028  | 231.121 | 0.014  | 0.039  | 316.221 | 0.023  | 0.052  |
| 152.183 | 0.023  | -0.034 | 231.129 | 0.029  | -0.006 | 316.29  | 0.009  | 0.011  |
| 152.193 | 0.006  | -0.011 | 231.142 | 0.011  | -0.034 | 316.3   | 0.013  | -0.010 |
| 153.021 | 0.030  | 0.051  | 231.15  | -0.014 | 0.000  | 316.31  | 0.053  | -0.010 |
| 153.027 | -0.004 | 0.007  | 231.209 | 0.007  | -0.004 | 316.341 | 0.003  | -0.008 |
| 153.044 | 0.028  | -0.027 | 231.227 | -0.015 | -0.085 | 316.347 | 0.029  | 0.008  |
| 153.054 | 0.141  | 0.109  | 232.055 | 0.018  | 0.019  | 316.352 | 0.007  | -0.008 |
| 153.061 | 0.016  | 0.000  | 232.062 | 0.021  | 0.026  | 317.102 | 0.017  | 0.027  |
| 153.072 | -0.013 | 0.001  | 232.068 | 0.027  | 0.046  | 317.113 | 0.011  | -0.026 |
| 153.078 | -0.144 | 0.043  | 232.077 | 0.006  | -0.033 | 317.122 | 0.004  | -0.024 |
| 153.084 | -0.022 | -0.038 | 232.105 | 0.010  | 0.014  | 317.136 | 0.012  | 0.024  |
| 153.09  | 0.127  | 0.032  | 232.112 | 0.005  | 0.000  | 317.146 | 0.012  | 0.017  |
| 153.097 | 0.075  | -0.039 | 232.124 | 0.079  | 0.025  | 317.158 | 0.010  | 0.003  |

|         |        |        |         |        |        |         |        |        |
|---------|--------|--------|---------|--------|--------|---------|--------|--------|
| 153.126 | -0.013 | 0.001  | 232.131 | 0.042  | -0.019 | 317.167 | 0.012  | 0.036  |
| 153.155 | -0.013 | 0.001  | 232.136 | 0.021  | -0.007 | 317.178 | 0.025  | -0.054 |
| 154.049 | 0.020  | 0.012  | 232.142 | 0.008  | -0.014 | 317.19  | 0.019  | 0.026  |
| 154.056 | 0.027  | 0.039  | 232.171 | 0.009  | 0.002  | 317.198 | 0.031  | 0.036  |
| 154.064 | 0.036  | 0.026  | 233.053 | 0.014  | -0.026 | 317.207 | 0.062  | -0.074 |
| 154.072 | 0.017  | -0.002 | 233.078 | 0.010  | 0.012  | 317.212 | 0.043  | -0.051 |
| 154.078 | 0.019  | 0.038  | 233.096 | 0.031  | 0.033  | 317.223 | 0.003  | -0.027 |
| 154.085 | 0.049  | -0.022 | 233.106 | 0.001  | -0.041 | 317.247 | 0.012  | 0.017  |
| 154.092 | 0.057  | -0.024 | 233.115 | -0.163 | 0.043  | 317.306 | 0.007  | 0.010  |
| 154.121 | 0.012  | 0.017  | 233.121 | -0.035 | 0.000  | 318.102 | 0.000  | -0.036 |
| 155.009 | -0.004 | -0.067 | 233.132 | 0.024  | 0.000  | 318.109 | 0.006  | -0.002 |
| 155.028 | 0.019  | -0.005 | 233.176 | 0.007  | 0.005  | 318.123 | 0.016  | 0.023  |
| 155.071 | 0.100  | 0.033  | 233.203 | 0.012  | 0.017  | 318.135 | 0.076  | 0.056  |
| 155.077 | -0.001 | 0.006  | 233.212 | 0.015  | 0.017  | 318.141 | 0.040  | 0.018  |
| 155.09  | -0.023 | 0.006  | 233.238 | 0.012  | 0.017  | 318.154 | 0.002  | -0.030 |
| 155.107 | 0.112  | 0.075  | 233.247 | -0.004 | 0.016  | 318.168 | 0.014  | 0.039  |
| 155.113 | 0.012  | -0.048 | 233.256 | -0.006 | 0.008  | 318.187 | 0.009  | 0.009  |
| 155.14  | -0.003 | 0.021  | 233.266 | -0.018 | 0.006  | 318.204 | 0.006  | -0.002 |
| 155.169 | 0.003  | -0.008 | 233.275 | -0.012 | 0.003  | 318.209 | 0.010  | 0.014  |
| 155.176 | -0.024 | 0.006  | 233.283 | -0.098 | 0.015  | 318.218 | 0.003  | -0.028 |
| 155.191 | -0.015 | 0.003  | 233.292 | -0.049 | 0.005  | 318.229 | 0.009  | 0.009  |
| 155.198 | -0.012 | -0.017 | 233.301 | -0.038 | 0.002  | 318.24  | 0.012  | 0.017  |
| 155.205 | 0.029  | 0.070  | 233.311 | -0.012 | 0.003  | 318.25  | 0.008  | -0.034 |
| 155.212 | 0.001  | -0.007 | 233.319 | -0.016 | 0.000  | 319.122 | 0.000  | -0.036 |
| 155.232 | -0.006 | 0.021  | 234.021 | -0.009 | -0.061 | 319.129 | -0.005 | -0.038 |
| 155.239 | 0.003  | -0.002 | 234.041 | 0.012  | 0.017  | 319.148 | -0.015 | 0.007  |
| 155.264 | 0.010  | 0.012  | 234.056 | 0.024  | 0.011  | 319.153 | 0.045  | 0.037  |
| 156.072 | 0.108  | 0.080  | 234.062 | 0.020  | 0.009  | 319.16  | 0.050  | 0.066  |
| 156.079 | -0.019 | 0.015  | 234.072 | 0.030  | 0.015  | 319.171 | 0.005  | 0.018  |
| 156.092 | 0.020  | -0.073 | 234.127 | -0.016 | 0.001  | 319.176 | 0.018  | 0.030  |
| 156.097 | 0.003  | -0.008 | 234.133 | -0.013 | 0.000  | 319.201 | -0.023 | -0.085 |
| 156.104 | 0.026  | -0.013 | 234.141 | -0.155 | 0.022  | 319.243 | 0.001  | -0.039 |
| 156.111 | 0.039  | 0.031  | 234.148 | 0.123  | -0.095 | 320.111 | 0.018  | -0.002 |
| 156.134 | 0.002  | 0.013  | 234.232 | -0.014 | 0.004  | 320.117 | 0.032  | 0.036  |
| 156.14  | 0.047  | 0.070  | 234.241 | -0.015 | 0.002  | 320.122 | 0.022  | 0.033  |
| 156.17  | 0.010  | 0.010  | 234.268 | -0.012 | -0.028 | 320.131 | 0.047  | 0.041  |
| 157.016 | 0.011  | 0.016  | 234.277 | -0.010 | 0.019  | 320.141 | 0.005  | -0.034 |
| 157.086 | 0.075  | -0.021 | 234.285 | 0.012  | 0.017  | 320.151 | 0.016  | -0.017 |
| 157.152 | -0.003 | -0.013 | 234.313 | 0.010  | -0.006 | 320.186 | 0.010  | 0.012  |
| 157.159 | -0.017 | -0.001 | 234.318 | 0.030  | 0.044  | 320.197 | 0.012  | 0.017  |
| 157.181 | -0.026 | 0.000  | 234.358 | 0.011  | -0.013 | 320.207 | 0.007  | 0.005  |
| 157.188 | 0.011  | -0.003 | 234.367 | 0.007  | -0.009 | 320.218 | 0.004  | -0.027 |
| 157.204 | -0.037 | 0.004  | 234.376 | 0.005  | -0.014 | 320.227 | 0.010  | 0.014  |
| 157.211 | -0.003 | -0.034 | 234.381 | 0.025  | -0.031 | 320.238 | 0.009  | -0.029 |
| 157.218 | 0.048  | 0.030  | 234.42  | 0.007  | -0.008 | 320.248 | 0.002  | -0.030 |
| 157.226 | -0.020 | -0.001 | 234.425 | 0.008  | -0.004 | 321.113 | 0.010  | 0.012  |
| 157.233 | -0.038 | 0.005  | 235.073 | -0.011 | -0.053 | 321.123 | 0.047  | 0.019  |

|         |        |        |         |        |        |         |        |        |
|---------|--------|--------|---------|--------|--------|---------|--------|--------|
| 157.239 | 0.012  | -0.043 | 235.09  | 0.003  | -0.003 | 321.134 | 0.016  | -0.053 |
| 157.247 | 0.022  | 0.028  | 235.101 | 0.018  | 0.029  | 321.142 | 0.029  | 0.041  |
| 157.269 | 0.000  | -0.009 | 235.109 | 0.090  | 0.090  | 321.15  | 0.019  | 0.016  |
| 157.276 | 0.040  | 0.011  | 235.116 | -0.022 | -0.050 | 321.159 | 0.006  | 0.020  |
| 158.027 | 0.012  | 0.024  | 235.122 | -0.033 | 0.017  | 321.173 | -0.011 | 0.014  |
| 158.057 | 0.012  | 0.024  | 235.13  | -0.005 | 0.009  | 321.182 | -0.043 | 0.006  |
| 158.065 | 0.028  | 0.037  | 235.139 | 0.010  | -0.006 | 321.193 | -0.018 | 0.005  |
| 158.076 | 0.081  | 0.042  | 235.147 | 0.093  | -0.109 | 321.203 | -0.002 | 0.035  |
| 158.086 | -0.026 | 0.002  | 235.236 | 0.037  | -0.010 | 321.213 | 0.017  | 0.027  |
| 158.094 | 0.037  | 0.024  | 235.264 | 0.007  | -0.009 | 321.224 | -0.005 | -0.086 |
| 158.1   | -0.005 | -0.038 | 235.269 | 0.015  | 0.009  | 321.235 | 0.017  | 0.017  |
| 158.107 | 0.022  | -0.069 | 235.304 | 0.032  | -0.074 | 321.246 | 0.022  | 0.030  |
| 158.115 | -0.009 | -0.012 | 235.336 | 0.025  | -0.020 | 321.26  | 0.012  | 0.017  |
| 158.122 | 0.011  | -0.007 | 235.373 | -0.005 | -0.038 | 322.125 | 0.011  | -0.010 |
| 158.152 | -0.013 | 0.020  | 236.034 | 0.093  | 0.056  | 322.134 | 0.078  | 0.120  |
| 158.158 | 0.012  | 0.029  | 236.04  | -0.003 | -0.021 | 322.14  | 0.046  | -0.042 |
| 158.188 | 0.034  | 0.046  | 236.045 | 0.021  | 0.030  | 322.147 | 0.015  | 0.002  |
| 158.217 | 0.012  | 0.024  | 236.079 | 0.013  | 0.014  | 322.154 | 0.012  | 0.007  |
| 159.1   | 0.051  | -0.001 | 236.092 | -0.002 | -0.010 | 322.21  | 0.012  | 0.024  |
| 159.199 | 0.038  | 0.097  | 236.099 | -0.041 | 0.007  | 322.236 | 0.019  | 0.018  |
| 159.229 | 0.014  | -0.003 | 236.107 | 0.071  | 0.019  | 322.242 | -0.011 | -0.053 |
| 159.236 | -0.017 | -0.003 | 236.115 | 0.010  | 0.062  | 323.118 | 0.018  | 0.030  |
| 159.243 | 0.007  | -0.004 | 236.12  | -0.005 | -0.019 | 323.128 | 0.030  | 0.060  |
| 159.276 | 0.034  | -0.023 | 236.128 | 0.006  | -0.017 | 323.137 | 0.005  | -0.053 |
| 160.032 | -0.011 | -0.053 | 236.136 | 0.031  | -0.038 | 323.145 | 0.036  | 0.011  |
| 160.063 | 0.011  | 0.013  | 236.144 | 0.014  | -0.021 | 323.15  | 0.035  | 0.031  |
| 160.093 | 0.040  | 0.033  | 236.154 | 0.032  | 0.001  | 323.157 | 0.010  | 0.003  |
| 160.099 | 0.097  | -0.015 | 236.163 | -0.015 | 0.007  | 323.164 | 0.007  | 0.005  |
| 160.104 | -0.037 | -0.002 | 236.171 | -0.020 | 0.005  | 323.21  | 0.014  | 0.039  |
| 160.168 | 0.007  | -0.005 | 236.199 | 0.007  | -0.008 | 323.237 | 0.010  | 0.014  |
| 161.048 | 0.009  | -0.052 | 236.204 | -0.006 | -0.003 | 323.252 | 0.007  | 0.010  |
| 161.055 | 0.017  | -0.019 | 237.075 | 0.002  | 0.001  | 323.279 | 0.010  | 0.014  |
| 161.066 | 0.027  | 0.031  | 237.087 | 0.010  | -0.009 | 324.127 | 0.009  | 0.009  |
| 161.072 | 0.095  | 0.077  | 237.107 | 0.085  | 0.077  | 324.145 | 0.026  | -0.027 |
| 161.08  | -0.032 | 0.007  | 237.113 | 0.006  | -0.013 | 324.155 | 0.033  | 0.029  |
| 161.088 | -0.008 | -0.038 | 237.123 | -0.002 | -0.006 | 324.165 | 0.068  | 0.065  |
| 161.096 | 0.007  | -0.013 | 237.133 | 0.005  | -0.009 | 324.171 | 0.003  | -0.009 |
| 161.103 | 0.005  | -0.005 | 237.153 | 0.004  | -0.005 | 324.201 | 0.009  | 0.009  |
| 161.117 | -0.003 | -0.008 | 237.163 | 0.007  | -0.008 | 325.134 | 0.028  | 0.050  |
| 161.177 | 0.010  | 0.014  | 237.195 | -0.007 | -0.001 | 325.14  | -0.049 | 0.008  |
| 162.031 | 0.010  | 0.003  | 237.235 | 0.016  | 0.012  | 325.146 | -0.063 | 0.107  |
| 162.042 | 0.113  | 0.099  | 237.244 | 0.018  | 0.027  | 325.154 | -0.005 | 0.020  |
| 162.049 | -0.013 | 0.005  | 237.253 | 0.018  | 0.030  | 325.162 | -0.003 | -0.065 |
| 162.058 | 0.027  | 0.026  | 237.28  | 0.007  | 0.005  | 325.169 | -0.008 | -0.042 |
| 162.069 | -0.002 | -0.018 | 237.29  | 0.040  | 0.034  | 325.192 | -0.013 | 0.000  |
| 162.078 | 0.033  | 0.020  | 237.298 | 0.007  | 0.010  | 325.203 | 0.012  | 0.024  |
| 162.085 | 0.033  | -0.042 | 237.308 | 0.006  | -0.002 | 325.225 | 0.006  | 0.006  |

|         |        |        |         |        |        |         |        |        |
|---------|--------|--------|---------|--------|--------|---------|--------|--------|
| 162.093 | 0.050  | 0.078  | 237.329 | 0.041  | -0.010 | 326.11  | 0.009  | 0.009  |
| 162.099 | 0.004  | -0.023 | 237.334 | 0.007  | 0.010  | 326.116 | -0.011 | -0.053 |
| 162.108 | 0.021  | -0.036 | 238.053 | 0.003  | -0.009 | 326.134 | 0.002  | -0.030 |
| 162.115 | 0.038  | -0.016 | 238.067 | 0.011  | 0.016  | 326.139 | 0.014  | 0.007  |
| 162.145 | 0.017  | -0.006 | 238.082 | -0.013 | 0.001  | 326.148 | 0.030  | 0.016  |
| 162.176 | 0.007  | 0.005  | 238.09  | 0.006  | 0.010  | 326.155 | 0.043  | 0.037  |
| 163.03  | 0.017  | 0.006  | 238.098 | 0.025  | 0.031  | 326.161 | 0.010  | 0.006  |
| 163.037 | 0.072  | 0.076  | 238.111 | 0.013  | 0.027  | 326.175 | 0.012  | 0.024  |
| 163.042 | 0.021  | -0.026 | 238.12  | 0.040  | -0.033 | 326.181 | 0.006  | 0.006  |
| 163.054 | -0.014 | 0.002  | 238.126 | 0.012  | 0.047  | 326.191 | 0.020  | 0.003  |
| 163.064 | -0.016 | 0.000  | 238.132 | 0.009  | 0.012  | 326.214 | 0.014  | 0.039  |
| 163.088 | 0.030  | -0.020 | 238.143 | 0.041  | -0.090 | 326.228 | 0.009  | 0.003  |
| 163.093 | 0.063  | 0.041  | 238.15  | 0.003  | -0.008 | 327.082 | 0.018  | 0.012  |
| 163.1   | -0.019 | -0.005 | 238.165 | -0.010 | -0.001 | 327.092 | 0.042  | 0.048  |
| 163.131 | -0.003 | -0.005 | 238.183 | 0.012  | 0.035  | 327.097 | 0.044  | 0.042  |
| 163.138 | -0.001 | -0.011 | 238.191 | 0.017  | -0.067 | 327.102 | 0.024  | -0.017 |
| 163.145 | -0.002 | 0.001  | 238.227 | 0.039  | 0.057  | 327.112 | 0.012  | -0.002 |
| 163.161 | -0.009 | -0.007 | 238.236 | 0.005  | -0.009 | 327.123 | -0.018 | -0.007 |
| 163.168 | 0.018  | 0.040  | 238.255 | 0.011  | 0.016  | 327.171 | 0.021  | 0.028  |
| 163.175 | 0.022  | 0.011  | 238.264 | 0.028  | -0.016 | 327.177 | 0.009  | 0.009  |
| 163.183 | 0.005  | -0.009 | 238.273 | -0.001 | -0.032 | 327.182 | 0.007  | 0.030  |
| 163.198 | 0.031  | 0.036  | 238.301 | 0.025  | -0.031 | 327.192 | 0.017  | -0.050 |
| 163.205 | 0.027  | 0.025  | 238.332 | 0.007  | 0.005  | 327.202 | 0.008  | -0.007 |
| 163.213 | 0.029  | 0.026  | 239.091 | 0.038  | -0.007 | 327.212 | 0.037  | 0.036  |
| 163.22  | -0.011 | -0.053 | 239.096 | 0.035  | 0.018  | 327.222 | 0.007  | 0.010  |
| 163.228 | 0.017  | 0.027  | 239.103 | 0.014  | 0.057  | 327.235 | -0.004 | -0.048 |
| 163.236 | 0.033  | 0.034  | 239.112 | -0.026 | 0.015  | 328.105 | -0.011 | -0.053 |
| 163.243 | 0.024  | -0.004 | 239.119 | 0.028  | -0.033 | 328.122 | 0.010  | 0.012  |
| 164.046 | 0.019  | 0.015  | 239.126 | 0.017  | -0.038 | 328.133 | 0.031  | 0.027  |
| 164.052 | 0.005  | -0.042 | 239.142 | 0.004  | -0.024 | 328.149 | 0.010  | -0.020 |
| 164.058 | 0.082  | 0.101  | 239.151 | 0.020  | 0.024  | 328.16  | 0.016  | -0.008 |
| 164.064 | 0.002  | -0.003 | 239.169 | 0.007  | -0.014 | 328.168 | 0.033  | 0.034  |
| 164.072 | 0.003  | -0.009 | 239.178 | 0.007  | 0.012  | 328.177 | 0.028  | 0.050  |
| 164.081 | 0.061  | 0.032  | 239.187 | 0.031  | 0.037  | 328.19  | 0.003  | -0.049 |
| 164.09  | -0.013 | -0.049 | 239.214 | -0.004 | -0.003 | 328.195 | 0.007  | 0.005  |
| 164.097 | 0.082  | 0.089  | 239.223 | 0.019  | -0.001 | 328.214 | 0.016  | 0.011  |
| 164.105 | -0.003 | 0.001  | 239.269 | 0.017  | 0.027  | 328.22  | 0.017  | 0.027  |
| 164.113 | 0.029  | -0.051 | 240.054 | 0.049  | 0.067  | 328.229 | 0.010  | 0.006  |
| 164.12  | -0.006 | -0.014 | 240.06  | 0.062  | 0.022  | 329.13  | 0.032  | 0.041  |
| 164.126 | 0.028  | -0.002 | 240.067 | 0.003  | 0.036  | 329.136 | 0.028  | 0.035  |
| 164.134 | 0.032  | 0.049  | 240.073 | 0.011  | -0.053 | 329.145 | -0.008 | -0.036 |
| 164.156 | 0.018  | 0.009  | 240.078 | -0.040 | 0.009  | 329.153 | 0.034  | 0.064  |
| 164.165 | 0.026  | 0.010  | 240.085 | -0.034 | 0.009  | 329.158 | -0.011 | -0.022 |
| 164.171 | 0.017  | 0.027  | 240.094 | 0.019  | 0.013  | 329.167 | -0.003 | -0.045 |
| 164.196 | 0.010  | 0.012  | 240.103 | 0.019  | 0.019  | 329.173 | 0.006  | -0.002 |
| 165.041 | -0.012 | 0.004  | 240.112 | 0.016  | -0.010 | 329.183 | 0.012  | 0.024  |
| 165.048 | 0.015  | 0.021  | 240.121 | 0.014  | 0.046  | 329.192 | 0.010  | 0.006  |

|         |        |        |         |        |        |         |        |        |
|---------|--------|--------|---------|--------|--------|---------|--------|--------|
| 165.055 | 0.083  | 0.045  | 240.13  | 0.048  | 0.038  | 329.208 | 0.009  | 0.011  |
| 165.061 | -0.059 | 0.015  | 240.14  | -0.008 | 0.001  | 329.223 | 0.026  | 0.029  |
| 165.066 | -0.022 | -0.015 | 240.148 | -0.008 | -0.016 | 329.234 | 0.016  | 0.018  |
| 165.074 | -0.021 | 0.003  | 240.157 | 0.020  | 0.024  | 329.245 | 0.012  | 0.017  |
| 165.081 | -0.031 | 0.008  | 240.166 | 0.028  | 0.043  | 330.174 | 0.036  | 0.073  |
| 165.088 | 0.030  | 0.046  | 240.174 | 0.002  | -0.003 | 330.182 | 0.074  | 0.078  |
| 165.096 | 0.028  | 0.027  | 240.203 | 0.021  | 0.023  | 330.191 | 0.007  | -0.068 |
| 165.107 | -0.028 | 0.000  | 240.212 | 0.018  | 0.013  | 330.199 | 0.004  | -0.031 |
| 165.115 | 0.022  | 0.046  | 240.22  | -0.008 | -0.094 | 330.249 | 0.012  | 0.017  |
| 165.126 | 0.054  | 0.073  | 240.239 | 0.015  | 0.016  | 331.142 | -0.005 | -0.038 |
| 165.133 | 0.009  | -0.014 | 240.248 | 0.014  | 0.008  | 331.172 | -0.002 | -0.026 |
| 165.155 | 0.021  | 0.047  | 240.998 | -0.017 | -0.001 | 331.177 | 0.092  | 0.059  |
| 165.164 | 0.023  | -0.005 | 241.053 | 0.012  | 0.035  | 331.186 | 0.037  | 0.092  |
| 165.197 | 0.009  | 0.009  | 241.067 | -0.217 | 0.031  | 331.193 | 0.009  | 0.003  |
| 166.027 | 0.008  | -0.004 | 241.074 | -0.016 | 0.000  | 332.178 | 0.008  | -0.026 |
| 166.038 | 0.017  | -0.014 | 241.103 | 0.096  | -0.089 | 332.185 | 0.020  | -0.016 |
| 166.05  | -0.011 | -0.053 | 241.112 | 0.050  | -0.010 | 332.2   | 0.022  | 0.030  |
| 166.062 | 0.047  | 0.043  | 241.117 | 0.039  | 0.035  | 332.205 | 0.010  | 0.010  |
| 166.069 | -0.212 | 0.028  | 241.123 | 0.006  | -0.002 | 333.173 | 0.026  | 0.029  |
| 166.086 | 0.022  | 0.021  | 241.13  | 0.026  | 0.034  | 333.186 | 0.000  | -0.083 |
| 166.097 | 0.081  | 0.091  | 241.184 | 0.007  | -0.004 | 333.191 | 0.046  | 0.069  |
| 166.105 | 0.110  | -0.156 | 241.202 | 0.006  | -0.004 | 333.198 | 0.029  | 0.068  |
| 166.192 | -0.064 | 0.016  | 241.219 | 0.007  | -0.004 | 333.205 | -0.005 | 0.002  |
| 166.211 | 0.006  | -0.007 | 241.252 | 0.027  | -0.006 | 333.284 | 0.009  | 0.003  |
| 166.222 | -0.133 | 0.025  | 241.283 | 0.005  | -0.009 | 334.144 | 0.012  | 0.017  |
| 166.241 | 0.004  | -0.008 | 241.289 | -0.073 | -0.002 | 334.191 | -0.005 | -0.054 |
| 166.257 | 0.003  | -0.009 | 241.294 | -0.014 | 0.002  | 334.201 | 0.026  | -0.007 |
| 166.268 | -0.231 | 0.029  | 241.302 | -0.088 | 0.007  | 334.207 | 0.036  | 0.033  |
| 166.274 | -0.013 | 0.001  | 241.31  | -0.013 | 0.002  | 334.215 | 0.078  | -0.037 |
| 166.294 | -0.027 | 0.007  | 241.32  | 0.007  | 0.010  | 334.222 | 0.037  | -0.037 |
| 166.306 | -0.013 | 0.001  | 241.329 | -0.007 | 0.007  | 334.231 | 0.012  | 0.024  |
| 167.019 | 0.053  | 0.012  | 241.357 | -0.050 | 0.005  | 334.263 | 0.012  | 0.017  |
| 167.025 | 0.052  | -0.006 | 241.365 | -0.060 | 0.011  | 335.129 | 0.012  | 0.017  |
| 167.031 | -0.014 | 0.004  | 241.406 | -0.030 | 0.004  | 335.141 | 0.017  | -0.051 |
| 167.055 | 0.036  | 0.037  | 241.411 | -0.065 | 0.010  | 335.148 | 0.039  | 0.007  |
| 167.063 | 0.010  | -0.015 | 241.428 | -0.013 | 0.000  | 335.155 | 0.020  | 0.035  |
| 167.069 | -0.068 | 0.029  | 241.467 | -0.012 | 0.005  | 335.16  | 0.016  | 0.007  |
| 167.077 | -0.058 | 0.028  | 242.045 | 0.010  | 0.010  | 335.166 | 0.018  | 0.025  |
| 167.087 | 0.034  | -0.006 | 242.054 | 0.026  | 0.044  | 335.177 | 0.061  | -0.020 |
| 167.097 | 0.023  | -0.039 | 242.064 | -0.006 | 0.009  | 335.186 | 0.007  | 0.014  |
| 167.103 | 0.081  | 0.001  | 242.071 | -0.199 | 0.041  | 335.206 | -0.038 | -0.003 |
| 167.11  | 0.003  | -0.008 | 242.076 | 0.006  | 0.027  | 335.216 | -0.030 | -0.002 |
| 167.134 | 0.056  | 0.058  | 242.085 | 0.019  | -0.019 | 335.226 | -0.036 | -0.040 |
| 167.156 | -0.016 | 0.000  | 242.094 | 0.029  | 0.021  | 335.232 | -0.004 | -0.006 |
| 167.163 | -0.005 | 0.009  | 242.103 | 0.028  | -0.069 | 335.238 | 0.019  | 0.063  |
| 167.171 | -0.003 | -0.055 | 242.112 | 0.054  | -0.007 | 335.249 | 0.014  | -0.007 |
| 167.179 | 0.018  | 0.018  | 242.118 | 0.005  | -0.009 | 335.28  | 0.010  | 0.010  |

|         |        |        |         |        |        |         |        |        |
|---------|--------|--------|---------|--------|--------|---------|--------|--------|
| 167.201 | -0.011 | -0.053 | 242.139 | 0.041  | 0.049  | 335.291 | 0.028  | 0.028  |
| 167.232 | -0.011 | -0.053 | 242.148 | 0.030  | 0.023  | 335.313 | 0.009  | 0.011  |
| 168.033 | 0.009  | 0.011  | 242.157 | -0.015 | 0.002  | 336.118 | 0.009  | 0.003  |
| 168.041 | 0.014  | 0.039  | 242.166 | 0.012  | 0.017  | 336.135 | 0.020  | 0.025  |
| 168.048 | -0.004 | -0.042 | 242.176 | -0.013 | 0.001  | 336.148 | 0.006  | -0.021 |
| 168.064 | 0.009  | 0.037  | 242.185 | -0.007 | 0.051  | 336.154 | 0.006  | -0.002 |
| 168.069 | 0.028  | 0.052  | 242.208 | -0.013 | 0.001  | 336.162 | 0.019  | -0.009 |
| 168.075 | 0.040  | -0.006 | 242.993 | 0.009  | 0.009  | 336.177 | -0.002 | -0.026 |
| 168.081 | 0.028  | 0.046  | 243     | 0.002  | -0.030 | 337.145 | 0.009  | 0.011  |
| 168.088 | 0.019  | -0.102 | 243.006 | 0.010  | 0.010  | 337.159 | 0.035  | -0.013 |
| 168.1   | 0.005  | -0.016 | 243.043 | 0.017  | 0.027  | 337.168 | 0.040  | 0.025  |
| 168.126 | 0.010  | 0.006  | 243.062 | 0.007  | 0.010  | 337.176 | 0.083  | -0.072 |
| 168.141 | 0.003  | -0.042 | 243.079 | -0.065 | 0.021  | 337.181 | 0.017  | -0.012 |
| 168.149 | 0.015  | 0.019  | 243.085 | -0.030 | 0.003  | 337.186 | 0.009  | -0.014 |
| 168.176 | -0.011 | -0.053 | 243.091 | -0.039 | -0.001 | 337.194 | 0.010  | 0.006  |
| 169.005 | 0.010  | 0.010  | 243.108 | -0.025 | 0.007  | 337.224 | 0.009  | 0.011  |
| 169.074 | -0.119 | 0.009  | 243.115 | -0.013 | 0.001  | 337.246 | -0.011 | -0.053 |
| 169.082 | -0.007 | -0.137 | 243.123 | -0.036 | 0.005  | 337.256 | 0.020  | 0.026  |
| 169.089 | 0.170  | 0.207  | 243.132 | -0.085 | 0.011  | 337.267 | 0.030  | 0.021  |
| 169.122 | 0.012  | -0.006 | 243.143 | -0.064 | 0.007  | 337.288 | 0.004  | -0.032 |
| 169.146 | -0.013 | 0.001  | 243.15  | 0.059  | 0.011  | 337.31  | 0.026  | 0.025  |
| 169.153 | 0.086  | 0.063  | 243.159 | 0.088  | 0.085  | 337.331 | -0.002 | -0.026 |
| 169.16  | 0.008  | 0.032  | 243.168 | -0.013 | -0.002 | 338.126 | 0.015  | 0.022  |
| 169.168 | -0.015 | 0.003  | 243.175 | -0.053 | 0.008  | 338.136 | 0.012  | 0.017  |
| 169.183 | 0.015  | 0.049  | 243.191 | 0.032  | -0.045 | 338.15  | 0.022  | -0.022 |
| 169.191 | -0.022 | -0.005 | 243.199 | 0.034  | -0.044 | 338.166 | 0.028  | -0.014 |
| 169.199 | -0.015 | 0.003  | 243.207 | 0.006  | -0.007 | 338.182 | 0.005  | -0.009 |
| 169.207 | 0.006  | -0.007 | 243.216 | 0.012  | 0.011  | 338.203 | 0.012  | 0.017  |
| 169.214 | -0.028 | -0.011 | 243.252 | -0.007 | 0.000  | 339.134 | 0.012  | 0.017  |
| 169.221 | 0.002  | -0.026 | 243.257 | -0.012 | 0.003  | 339.147 | 0.031  | 0.002  |
| 169.229 | -0.008 | -0.007 | 244.068 | 0.021  | 0.030  | 339.156 | 0.032  | 0.035  |
| 169.245 | -0.015 | 0.007  | 244.075 | 0.023  | -0.001 | 339.163 | 0.013  | -0.030 |
| 169.251 | 0.032  | 0.031  | 244.082 | 0.014  | 0.019  | 339.168 | 0.012  | 0.024  |
| 169.993 | 0.009  | 0.009  | 244.103 | -0.004 | -0.075 | 339.177 | -0.005 | -0.054 |
| 170.001 | 0.007  | 0.005  | 244.108 | 0.042  | 0.044  | 339.184 | 0.027  | 0.038  |
| 170.054 | 0.014  | -0.077 | 244.116 | 0.016  | 0.086  | 339.201 | 0.010  | 0.006  |
| 170.061 | 0.103  | 0.100  | 244.124 | -0.006 | -0.019 | 339.26  | -0.005 | -0.038 |
| 170.066 | 0.019  | 0.075  | 244.13  | 0.035  | 0.020  | 340.124 | 0.018  | -0.002 |
| 170.071 | 0.006  | -0.011 | 244.139 | 0.015  | 0.011  | 340.13  | 0.063  | 0.042  |
| 170.077 | -0.012 | -0.018 | 244.144 | 0.001  | -0.005 | 340.14  | 0.039  | -0.003 |
| 170.086 | 0.024  | -0.052 | 244.151 | 0.024  | -0.031 | 340.145 | -0.001 | -0.050 |
| 170.091 | 0.000  | -0.051 | 244.157 | 0.027  | -0.038 | 340.156 | 0.019  | 0.022  |
| 170.098 | -0.013 | 0.002  | 244.162 | 0.007  | 0.019  | 340.187 | -0.002 | -0.026 |
| 170.107 | 0.003  | -0.008 | 244.167 | 0.002  | -0.003 | 340.2   | 0.009  | 0.009  |
| 170.114 | 0.023  | 0.012  | 244.175 | 0.016  | 0.000  | 341.137 | 0.006  | -0.002 |
| 170.122 | 0.024  | 0.017  | 244.193 | -0.012 | 0.004  | 341.145 | 0.029  | 0.034  |
| 170.129 | 0.002  | -0.003 | 244.203 | 0.041  | 0.030  | 341.152 | 0.012  | -0.019 |

|                |        |        |                |        |        |                |        |        |
|----------------|--------|--------|----------------|--------|--------|----------------|--------|--------|
| <b>170.152</b> | 0.053  | 0.048  | <b>244.212</b> | 0.066  | -0.036 | <b>341.162</b> | 0.018  | -0.003 |
| <b>170.16</b>  | 0.050  | 0.004  | <b>244.221</b> | 0.006  | -0.002 | <b>341.176</b> | 0.001  | -0.053 |
| <b>170.19</b>  | 0.027  | 0.042  | <b>244.239</b> | 0.010  | 0.010  | <b>341.181</b> | 0.002  | -0.030 |
| <b>170.213</b> | 0.012  | 0.017  | <b>244.249</b> | 0.026  | -0.010 | <b>341.189</b> | 0.032  | 0.047  |
| <b>170.221</b> | 0.010  | 0.006  | <b>244.259</b> | 0.006  | -0.002 | <b>341.236</b> | 0.014  | 0.001  |
| <b>170.997</b> | -0.011 | -0.053 | <b>244.286</b> | 0.010  | 0.014  | <b>341.242</b> | 0.032  | -0.002 |
| <b>171.014</b> | 0.006  | 0.006  | <b>244.295</b> | 0.013  | -0.011 | <b>341.285</b> | 0.010  | 0.010  |
| <b>171.064</b> | 0.031  | 0.064  | <b>245.01</b>  | 0.063  | 0.068  | <b>342.15</b>  | 0.018  | 0.016  |
| <b>171.086</b> | -0.013 | 0.010  | <b>245.015</b> | 0.062  | 0.000  | <b>342.164</b> | 0.022  | -0.009 |
| <b>171.094</b> | 0.051  | -0.028 | <b>245.023</b> | 0.008  | -0.008 | <b>342.171</b> | 0.004  | -0.039 |
| <b>171.1</b>   | 0.086  | 0.115  | <b>245.055</b> | 0.014  | 0.039  | <b>342.179</b> | 0.016  | 0.020  |
| <b>171.107</b> | 0.003  | -0.021 | <b>245.084</b> | 0.018  | 0.000  | <b>342.242</b> | 0.012  | 0.017  |
| <b>171.131</b> | -0.030 | 0.008  | <b>245.094</b> | -0.003 | 0.003  | <b>342.287</b> | -0.011 | -0.053 |
| <b>171.138</b> | 0.013  | 0.019  | <b>245.103</b> | 0.002  | 0.039  | <b>343.169</b> | 0.022  | 0.014  |
| <b>171.161</b> | -0.025 | 0.004  | <b>245.11</b>  | -0.021 | -0.025 | <b>343.185</b> | 0.010  | 0.003  |
| <b>171.169</b> | 0.000  | -0.015 | <b>245.12</b>  | 0.013  | -0.022 | <b>343.193</b> | 0.015  | -0.005 |
| <b>171.2</b>   | 0.007  | -0.009 | <b>245.128</b> | 0.003  | 0.038  | <b>343.209</b> | 0.013  | -0.051 |
| <b>171.207</b> | 0.031  | 0.039  | <b>245.133</b> | 0.004  | 0.003  | <b>343.217</b> | 0.022  | 0.026  |
| <b>171.23</b>  | 0.010  | 0.006  | <b>245.142</b> | 0.028  | 0.049  | <b>343.224</b> | -0.011 | -0.053 |
| <b>171.237</b> | 0.018  | 0.017  | <b>245.147</b> | 0.021  | 0.034  | <b>344.164</b> | 0.010  | 0.014  |
| <b>171.246</b> | 0.013  | 0.013  | <b>245.157</b> | 0.039  | -0.026 | <b>344.181</b> | -0.004 | -0.041 |
| <b>172.063</b> | -0.021 | 0.002  | <b>245.165</b> | 0.021  | 0.018  | <b>344.188</b> | 0.006  | -0.002 |
| <b>172.068</b> | -0.086 | 0.013  | <b>245.17</b>  | -0.021 | -0.002 | <b>344.194</b> | 0.010  | -0.007 |
| <b>172.078</b> | -0.067 | 0.029  | <b>245.183</b> | 0.026  | -0.013 | <b>344.207</b> | -0.005 | -0.038 |
| <b>172.086</b> | 0.067  | 0.004  | <b>245.188</b> | -0.013 | 0.000  | <b>344.214</b> | 0.017  | 0.027  |
| <b>172.091</b> | 0.067  | -0.061 | <b>245.201</b> | 0.005  | -0.011 | <b>345.182</b> | 0.016  | 0.013  |
| <b>172.096</b> | 0.062  | -0.005 | <b>245.22</b>  | 0.012  | 0.000  | <b>345.228</b> | 0.012  | 0.017  |
| <b>172.103</b> | 0.024  | 0.021  | <b>245.238</b> | 0.009  | 0.011  | <b>346.184</b> | 0.010  | 0.010  |
| <b>172.109</b> | -0.015 | 0.002  | <b>245.256</b> | 0.019  | 0.005  | <b>347.178</b> | 0.012  | 0.017  |
| <b>172.124</b> | 0.001  | 0.027  | <b>245.262</b> | 0.026  | 0.016  | <b>347.185</b> | 0.047  | 0.031  |
| <b>172.135</b> | -0.011 | -0.050 | <b>245.275</b> | 0.009  | 0.011  | <b>347.195</b> | 0.011  | -0.059 |
| <b>172.143</b> | -0.014 | 0.000  | <b>245.293</b> | 0.007  | 0.010  | <b>347.202</b> | 0.016  | 0.018  |
| <b>172.159</b> | 0.018  | 0.021  | <b>245.298</b> | 0.041  | 0.037  | <b>347.213</b> | 0.009  | 0.003  |
| <b>172.166</b> | 0.004  | 0.000  | <b>246.025</b> | 0.023  | 0.023  | <b>348.17</b>  | 0.012  | 0.017  |
| <b>172.227</b> | 0.007  | 0.005  | <b>246.031</b> | 0.009  | 0.011  | <b>348.184</b> | 0.016  | -0.055 |
| <b>173.072</b> | 0.030  | -0.004 | <b>246.085</b> | 0.051  | 0.061  | <b>348.195</b> | 0.010  | 0.014  |
| <b>173.08</b>  | -0.039 | -0.018 | <b>246.09</b>  | -0.020 | -0.086 | <b>348.206</b> | 0.007  | 0.010  |
| <b>173.087</b> | -0.015 | -0.006 | <b>246.096</b> | 0.091  | 0.089  | <b>349.154</b> | 0.002  | -0.030 |
| <b>173.095</b> | 0.091  | 0.075  | <b>246.104</b> | 0.021  | 0.049  | <b>349.166</b> | 0.020  | 0.023  |
| <b>173.101</b> | 0.017  | 0.027  | <b>246.109</b> | -0.007 | -0.027 | <b>349.173</b> | 0.015  | -0.039 |
| <b>173.113</b> | 0.022  | -0.002 | <b>246.115</b> | 0.016  | 0.003  | <b>349.181</b> | 0.021  | -0.007 |
| <b>173.174</b> | -0.013 | 0.002  | <b>246.126</b> | 0.006  | -0.013 | <b>349.196</b> | -0.026 | 0.012  |
| <b>173.181</b> | -0.012 | 0.003  | <b>246.137</b> | 0.008  | 0.015  | <b>349.207</b> | -0.015 | 0.002  |
| <b>173.202</b> | 0.007  | -0.005 | <b>246.146</b> | 0.015  | 0.013  | <b>349.254</b> | 0.013  | -0.014 |
| <b>173.213</b> | 0.002  | 0.006  | <b>246.157</b> | 0.016  | -0.009 | <b>350.162</b> | 0.010  | 0.012  |
| <b>174.036</b> | 0.012  | 0.017  | <b>246.168</b> | 0.030  | 0.014  | <b>350.187</b> | 0.006  | -0.023 |
| <b>174.059</b> | 0.021  | 0.025  | <b>246.183</b> | 0.036  | 0.057  | <b>350.204</b> | 0.010  | 0.003  |



|         |        |        |         |        |        |         |        |        |
|---------|--------|--------|---------|--------|--------|---------|--------|--------|
| 174.064 | 0.009  | 0.011  | 246.188 | 0.018  | 0.014  | 351.173 | 0.006  | 0.006  |
| 174.089 | -0.014 | 0.002  | 247.047 | -0.011 | -0.053 | 351.178 | 0.009  | 0.009  |
| 174.098 | 0.097  | 0.064  | 247.057 | 0.044  | 0.064  | 351.183 | 0.007  | 0.010  |
| 174.104 | 0.059  | -0.081 | 247.064 | 0.020  | -0.002 | 351.195 | -0.015 | -0.083 |
| 174.111 | 0.001  | -0.008 | 247.07  | 0.011  | 0.016  | 351.2   | 0.025  | -0.013 |
| 174.193 | 0.014  | -0.016 | 247.076 | 0.003  | 0.012  | 351.206 | 0.023  | 0.020  |
| 174.2   | 0.012  | -0.017 | 247.088 | -0.002 | -0.006 | 351.214 | -0.001 | 0.021  |
| 175.091 | 0.036  | 0.047  | 247.093 | -0.003 | 0.022  | 351.232 | 0.012  | 0.017  |
| 175.097 | -0.014 | -0.018 | 247.102 | -0.049 | -0.049 | 352.162 | 0.007  | 0.010  |
| 175.191 | -0.016 | -0.031 | 247.113 | -0.070 | 0.051  | 352.187 | 0.007  | 0.005  |
| 175.222 | -0.002 | -0.034 | 247.122 | -0.010 | -0.003 | 353.142 | -0.005 | -0.038 |
| 175.229 | -0.011 | 0.005  | 247.132 | 0.030  | 0.007  | 353.151 | 0.008  | -0.005 |
| 175.249 | 0.010  | 0.012  | 247.14  | 0.039  | 0.013  | 353.165 | 0.022  | 0.019  |
| 176.022 | 0.009  | 0.011  | 247.147 | 0.001  | -0.018 | 353.233 | -0.011 | -0.053 |
| 176.035 | 0.002  | -0.030 | 247.152 | 0.021  | 0.032  | 353.249 | 0.007  | 0.010  |
| 176.122 | 0.071  | -0.059 | 247.158 | 0.060  | 0.076  | 354.181 | 0.018  | 0.013  |
| 176.223 | -0.002 | -0.007 | 247.163 | 0.023  | 0.018  | 354.196 | 0.036  | -0.052 |
| 176.254 | 0.009  | -0.016 | 247.177 | -0.016 | -0.051 | 354.203 | 0.021  | -0.034 |
| 176.262 | 0.031  | 0.021  | 247.204 | 0.002  | -0.030 | 355.141 | 0.007  | 0.005  |
| 176.282 | 0.043  | -0.061 | 247.214 | -0.014 | 0.004  | 355.155 | 0.010  | 0.014  |
| 176.317 | 0.073  | -0.092 | 247.222 | -0.012 | 0.003  | 355.166 | 0.004  | -0.017 |
| 176.324 | 0.007  | -0.008 | 247.231 | 0.020  | 0.043  | 355.172 | -0.009 | -0.060 |
| 176.352 | 0.013  | -0.014 | 247.241 | 0.057  | 0.041  | 355.194 | 0.030  | 0.035  |
| 176.361 | 0.007  | -0.008 | 247.25  | 0.009  | 0.009  | 355.224 | 0.012  | 0.017  |
| 176.383 | 0.006  | -0.004 | 247.268 | 0.012  | 0.004  | 355.229 | 0.009  | 0.003  |
| 176.419 | 0.007  | -0.008 | 247.278 | 0.024  | 0.028  | 355.235 | 0.021  | 0.048  |
| 177.042 | 0.013  | 0.023  | 248.072 | 0.010  | 0.010  | 356.155 | 0.012  | 0.017  |
| 177.053 | -0.016 | -0.005 | 248.116 | -0.026 | -0.037 | 356.187 | -0.004 | -0.044 |
| 177.059 | 0.017  | 0.027  | 248.125 | -0.018 | 0.034  | 357.205 | 0.016  | 0.018  |
| 177.071 | -0.048 | 0.011  | 248.131 | -0.029 | 0.003  | 357.219 | 0.010  | 0.003  |
| 177.076 | 0.000  | -0.036 | 248.136 | 0.053  | 0.031  | 357.231 | 0.010  | 0.014  |
| 177.084 | 0.019  | 0.044  | 248.143 | 0.053  | -0.050 | 357.239 | -0.005 | -0.038 |
| 177.092 | 0.056  | 0.027  | 248.15  | 0.030  | -0.007 | 358.225 | 0.017  | 0.027  |
| 177.1   | 0.028  | 0.049  | 248.162 | 0.025  | -0.037 | 360.174 | 0.009  | 0.009  |
| 177.107 | -0.068 | 0.010  | 248.2   | 0.030  | -0.013 | 360.215 | 0.010  | 0.010  |
| 177.118 | 0.034  | -0.105 | 248.208 | -0.013 | 0.000  | 361.165 | 0.012  | 0.017  |
| 177.126 | -0.002 | -0.010 | 248.236 | 0.049  | -0.021 | 361.173 | -0.002 | -0.026 |
| 177.142 | 0.001  | 0.005  | 248.246 | 0.044  | -0.015 | 361.209 | 0.010  | 0.014  |
| 177.172 | 0.003  | -0.003 | 248.283 | 0.012  | 0.017  | 363.16  | 0.012  | 0.017  |
| 178.036 | 0.029  | -0.011 | 249.056 | 0.006  | 0.006  | 363.19  | -0.011 | -0.053 |
| 178.052 | 0.015  | 0.009  | 249.108 | -0.027 | -0.022 | 363.207 | 0.010  | 0.010  |
| 178.06  | -0.011 | -0.029 | 249.113 | 0.053  | 0.072  | 363.214 | 0.012  | 0.017  |
| 178.065 | 0.002  | 0.054  | 249.12  | -0.001 | 0.047  | 363.231 | -0.002 | 0.012  |
| 178.075 | 0.000  | 0.031  | 249.13  | 0.002  | -0.029 | 363.237 | 0.012  | 0.017  |
| 178.081 | 0.041  | 0.041  | 249.138 | 0.015  | -0.019 | 365.167 | 0.010  | 0.014  |
| 178.087 | -0.001 | -0.004 | 249.16  | 0.001  | -0.007 | 365.173 | 0.006  | -0.002 |
| 178.092 | 0.043  | -0.023 | 250.051 | -0.006 | -0.061 | 365.181 | 0.007  | 0.010  |

|                |        |        |                |        |        |                |        |        |
|----------------|--------|--------|----------------|--------|--------|----------------|--------|--------|
| <b>178.098</b> | 0.026  | -0.064 | <b>250.062</b> | 0.002  | -0.030 | <b>365.193</b> | -0.011 | -0.053 |
| <b>178.105</b> | -0.012 | 0.007  | <b>250.068</b> | 0.013  | 0.001  | <b>365.209</b> | 0.009  | 0.003  |
| <b>178.117</b> | -0.015 | 0.007  | <b>250.089</b> | 0.029  | 0.038  | <b>371.008</b> | 0.023  | 0.040  |
| <b>178.125</b> | 0.002  | -0.003 | <b>250.098</b> | 0.010  | 0.014  | <b>371.015</b> | -0.108 | 0.050  |
| <b>178.14</b>  | 0.017  | 0.022  | <b>250.104</b> | 0.023  | 0.007  | <b>371.022</b> | 0.004  | -0.012 |
| <b>179.026</b> | 0.097  | 0.005  | <b>250.113</b> | 0.020  | 0.016  | <b>371.148</b> | 0.013  | -0.009 |
| <b>179.031</b> | 0.006  | -0.014 | <b>250.121</b> | 0.040  | -0.070 | <b>371.158</b> | 0.038  | -0.008 |
| <b>179.042</b> | 0.049  | 0.069  | <b>250.126</b> | 0.005  | 0.048  | <b>371.165</b> | 0.013  | -0.020 |
| <b>179.048</b> | -0.085 | -0.007 | <b>250.132</b> | -0.026 | 0.061  | <b>371.193</b> | 0.025  | 0.031  |
| <b>179.056</b> | -0.022 | -0.004 | <b>250.137</b> | -0.059 | 0.012  | <b>371.198</b> | 0.008  | 0.006  |
| <b>179.064</b> | 0.007  | -0.066 | <b>250.145</b> | 0.010  | 0.002  | <b>371.204</b> | -0.048 | -0.003 |
| <b>179.072</b> | 0.011  | 0.008  | <b>250.165</b> | 0.004  | -0.008 | <b>371.21</b>  | -0.016 | 0.055  |
| <b>179.08</b>  | 0.003  | -0.008 | <b>250.178</b> | 0.018  | 0.000  | <b>371.22</b>  | 0.044  | -0.055 |
| <b>179.088</b> | 0.002  | -0.014 | <b>250.187</b> | 0.018  | 0.013  | <b>371.304</b> | -0.012 | -0.005 |
| <b>179.095</b> | -0.008 | -0.057 | <b>250.197</b> | 0.016  | 0.010  | <b>371.311</b> | 0.004  | -0.008 |
| <b>179.103</b> | 0.009  | -0.009 | <b>250.215</b> | 0.007  | -0.022 | <b>372.012</b> | -0.048 | 0.070  |
| <b>179.115</b> | -0.012 | -0.002 | <b>250.224</b> | 0.007  | 0.010  | <b>372.021</b> | -0.033 | 0.010  |
| <b>179.142</b> | -0.022 | -0.005 | <b>251.028</b> | 0.010  | 0.003  | <b>372.152</b> | 0.066  | 0.137  |
| <b>179.166</b> | 0.009  | 0.004  | <b>251.092</b> | 0.006  | -0.004 | <b>372.157</b> | 0.007  | 0.010  |
| <b>179.178</b> | 0.015  | -0.002 | <b>251.098</b> | 0.028  | 0.044  | <b>372.175</b> | -0.024 | -0.053 |
| <b>180.035</b> | 0.003  | 0.016  | <b>251.103</b> | 0.042  | 0.035  | <b>372.185</b> | -0.019 | 0.019  |
| <b>180.042</b> | 0.014  | -0.019 | <b>251.108</b> | 0.013  | -0.005 | <b>372.191</b> | 0.020  | 0.019  |
| <b>180.047</b> | 0.069  | 0.058  | <b>251.115</b> | -0.004 | -0.013 | <b>372.197</b> | -0.016 | 0.088  |
| <b>180.052</b> | 0.025  | -0.056 | <b>251.12</b>  | -0.012 | -0.004 | <b>372.21</b>  | 0.010  | 0.003  |
| <b>180.059</b> | 0.039  | 0.072  | <b>251.142</b> | -0.013 | 0.001  | <b>372.225</b> | 0.030  | 0.051  |
| <b>180.064</b> | -0.012 | 0.004  | <b>251.169</b> | -0.007 | 0.000  | <b>372.231</b> | -0.039 | 0.006  |
| <b>180.077</b> | -0.030 | -0.005 | <b>251.178</b> | 0.011  | -0.022 | <b>372.238</b> | 0.000  | 0.020  |
| <b>180.086</b> | 0.021  | 0.004  | <b>251.188</b> | -0.014 | 0.002  | <b>372.247</b> | -0.033 | 0.006  |
| <b>180.092</b> | -0.014 | 0.004  | <b>251.198</b> | -0.016 | 0.000  | <b>372.253</b> | 0.003  | 0.044  |
| <b>180.101</b> | -0.031 | 0.037  | <b>251.207</b> | 0.016  | 0.051  | <b>372.26</b>  | -0.008 | -0.004 |
| <b>180.108</b> | 0.081  | 0.005  | <b>251.244</b> | 0.014  | 0.039  | <b>372.266</b> | 0.010  | 0.003  |
| <b>180.115</b> | 0.062  | -0.064 | <b>251.249</b> | -0.015 | 0.007  | <b>372.277</b> | -0.025 | 0.004  |
| <b>180.123</b> | -0.014 | 0.002  | <b>251.281</b> | 0.008  | -0.021 | <b>372.282</b> | 0.002  | 0.055  |
| <b>180.151</b> | 0.009  | -0.014 | <b>252.021</b> | 0.005  | -0.056 | <b>372.31</b>  | 0.002  | -0.037 |
| <b>180.174</b> | 0.005  | -0.005 | <b>252.026</b> | 0.040  | 0.017  | <b>372.322</b> | 0.020  | 0.046  |
| <b>180.186</b> | -0.001 | -0.042 | <b>252.034</b> | 0.050  | 0.084  | <b>372.328</b> | 0.012  | 0.056  |
| <b>181.042</b> | 0.054  | -0.013 | <b>252.041</b> | 0.010  | 0.010  | <b>372.333</b> | -0.033 | 0.005  |
| <b>181.05</b>  | -0.002 | -0.026 | <b>252.076</b> | 0.009  | 0.009  | <b>372.373</b> | 0.008  | 0.037  |
| <b>181.068</b> | 0.046  | 0.068  | <b>252.09</b>  | 0.009  | -0.003 | <b>372.399</b> | 0.010  | 0.003  |
| <b>181.074</b> | 0.022  | 0.011  | <b>252.097</b> | 0.054  | 0.028  | <b>373.006</b> | -0.016 | -0.014 |
| <b>181.079</b> | -0.001 | -0.034 | <b>252.105</b> | 0.040  | 0.035  | <b>373.016</b> | -0.092 | 0.072  |
| <b>181.087</b> | 0.013  | 0.001  | <b>252.114</b> | -0.021 | 0.018  | <b>373.021</b> | 0.039  | 0.014  |
| <b>181.096</b> | 0.008  | 0.034  | <b>252.122</b> | 0.003  | -0.009 | <b>373.102</b> | 0.041  | 0.041  |
| <b>181.107</b> | -0.002 | -0.026 | <b>252.129</b> | 0.008  | -0.015 | <b>373.113</b> | -0.016 | -0.015 |
| <b>181.115</b> | 0.048  | -0.013 | <b>252.137</b> | 0.006  | -0.011 | <b>373.148</b> | 0.007  | -0.009 |
| <b>181.122</b> | 0.003  | 0.005  | <b>252.145</b> | 0.023  | 0.024  | <b>373.158</b> | 0.013  | 0.017  |
| <b>181.153</b> | 0.006  | -0.038 | <b>252.155</b> | -0.002 | -0.012 | <b>373.164</b> | 0.010  | 0.003  |

|         |        |        |         |        |        |         |        |        |
|---------|--------|--------|---------|--------|--------|---------|--------|--------|
| 182.046 | 0.009  | 0.009  | 252.168 | 0.006  | -0.007 | 373.193 | 0.018  | 0.034  |
| 182.055 | 0.041  | 0.044  | 252.182 | 0.016  | 0.031  | 373.198 | -0.013 | -0.003 |
| 182.064 | 0.040  | 0.043  | 252.216 | 0.008  | -0.003 | 373.204 | 0.025  | 0.026  |
| 182.072 | 0.015  | -0.045 | 252.271 | 0.012  | 0.024  | 373.215 | -0.083 | -0.013 |
| 182.077 | 0.027  | 0.014  | 252.304 | 0.012  | 0.024  | 373.22  | 0.029  | 0.034  |
| 182.083 | 0.017  | 0.000  | 253.039 | -0.012 | -0.071 | 373.226 | -0.017 | -0.063 |
| 182.094 | 0.018  | 0.014  | 253.106 | 0.007  | 0.028  | 373.231 | 0.005  | 0.029  |
| 182.101 | 0.004  | -0.033 | 253.116 | 0.072  | 0.058  | 373.237 | 0.007  | 0.005  |
| 182.112 | 0.019  | 0.016  | 253.125 | 0.017  | -0.004 | 373.243 | 0.002  | 0.019  |
| 182.117 | 0.012  | 0.035  | 253.131 | -0.020 | -0.014 | 373.249 | -0.014 | -0.018 |
| 182.125 | 0.025  | 0.029  | 253.141 | 0.006  | -0.016 | 373.258 | 0.000  | 0.015  |
| 182.141 | 0.010  | 0.014  | 253.16  | -0.007 | -0.037 | 373.316 | -0.005 | -0.038 |
| 182.156 | -0.003 | -0.048 | 253.169 | 0.008  | 0.042  | 374.007 | -0.017 | -0.003 |
| 183.039 | 0.069  | -0.090 | 253.187 | -0.017 | -0.002 | 374.013 | -0.040 | 0.052  |
| 183.045 | 0.026  | -0.029 | 253.197 | 0.001  | 0.003  | 374.02  | -0.075 | 0.065  |
| 183.054 | 0.028  | 0.010  | 253.215 | -0.013 | 0.001  | 374.03  | 0.052  | -0.014 |
| 183.059 | 0.023  | -0.008 | 253.295 | 0.024  | 0.000  | 374.037 | 0.007  | 0.005  |
| 183.065 | -0.021 | 0.014  | 254.042 | 0.024  | 0.024  | 374.074 | -0.017 | -0.001 |
| 183.072 | -0.036 | 0.030  | 254.052 | 0.013  | 0.009  | 374.086 | -0.015 | 0.007  |
| 183.078 | -0.097 | 0.097  | 254.089 | 0.004  | -0.004 | 374.098 | 0.018  | 0.016  |
| 183.086 | -0.014 | 0.000  | 254.105 | 0.038  | 0.061  | 374.212 | -0.005 | -0.038 |
| 183.091 | 0.048  | 0.002  | 254.114 | 0.028  | 0.063  | 378.177 | 0.005  | -0.007 |
| 183.097 | 0.040  | -0.050 | 254.122 | -0.008 | -0.037 | 383.193 | 0.012  | 0.017  |
| 183.106 | 0.010  | -0.026 | 254.131 | 0.020  | -0.027 | 388.032 | 0.006  | 0.038  |
| 183.118 | -0.016 | 0.022  | 254.137 | 0.021  | -0.033 | 388.037 | 0.073  | -0.006 |
| 183.129 | 0.067  | 0.002  | 254.143 | 0.002  | -0.019 | 388.042 | 0.005  | -0.026 |
| 183.137 | 0.024  | -0.006 | 254.151 | 0.005  | -0.009 | 388.048 | 0.011  | -0.019 |
| 183.153 | -0.027 | 0.003  | 254.158 | -0.012 | 0.005  | 388.123 | -0.013 | 0.002  |
| 183.161 | 0.001  | -0.032 | 254.176 | 0.019  | 0.024  | 388.135 | 0.002  | -0.030 |
| 183.169 | 0.002  | -0.030 | 254.185 | -0.011 | 0.000  | 388.158 | 0.007  | -0.009 |
| 183.177 | 0.008  | -0.004 | 254.27  | 0.023  | 0.027  | 388.211 | -0.005 | -0.038 |
| 183.201 | 0.007  | 0.010  | 255.051 | 0.012  | 0.024  | 388.216 | 0.008  | -0.004 |
| 184.031 | 0.006  | -0.011 | 255.099 | 0.057  | 0.010  | 388.233 | 0.019  | -0.015 |
| 184.039 | 0.078  | 0.011  | 255.104 | -0.026 | 0.037  | 388.239 | 0.029  | -0.024 |
| 184.047 | 0.050  | 0.046  | 255.11  | 0.032  | 0.003  | 388.246 | 0.019  | -0.092 |
| 184.06  | 0.021  | 0.015  | 255.116 | -0.033 | -0.029 | 389.026 | -0.002 | 0.006  |
| 184.074 | 0.022  | 0.011  | 255.122 | 0.010  | -0.012 | 389.032 | 0.032  | -0.021 |
| 184.086 | 0.028  | -0.063 | 255.127 | 0.010  | 0.003  | 389.038 | 0.016  | -0.098 |
| 184.094 | 0.005  | -0.004 | 255.139 | 0.019  | 0.020  | 389.043 | 0.057  | 0.101  |
| 184.106 | 0.017  | 0.026  | 255.153 | 0.017  | 0.013  | 389.052 | -0.016 | 0.001  |
| 184.114 | 0.003  | -0.042 | 255.158 | 0.016  | 0.005  | 389.105 | 0.009  | 0.009  |
| 184.122 | 0.059  | 0.010  | 255.167 | 0.001  | -0.019 | 389.117 | -0.002 | -0.026 |
| 184.13  | 0.033  | -0.012 | 255.176 | -0.011 | -0.012 | 389.128 | 0.015  | -0.005 |
| 184.138 | 0.016  | -0.009 | 255.186 | 0.013  | 0.006  | 389.152 | 0.043  | 0.013  |
| 184.146 | 0.060  | 0.045  | 255.194 | -0.007 | -0.010 | 389.158 | 0.027  | -0.030 |
| 184.153 | 0.013  | -0.012 | 255.204 | -0.020 | -0.041 | 389.163 | -0.013 | 0.001  |
| 184.161 | 0.010  | 0.006  | 255.214 | -0.013 | 0.001  | 389.174 | 0.033  | 0.044  |

|                |        |        |                |        |        |                |        |        |
|----------------|--------|--------|----------------|--------|--------|----------------|--------|--------|
| <b>184.205</b> | 0.012  | 0.017  | <b>255.26</b>  | 0.103  | 0.102  | <b>389.181</b> | 0.007  | -0.004 |
| <b>185.039</b> | -0.005 | -0.038 | <b>255.28</b>  | 0.003  | -0.009 | <b>389.186</b> | 0.010  | -0.013 |
| <b>185.057</b> | -0.247 | 0.035  | <b>255.289</b> | 0.010  | 0.010  | <b>389.197</b> | 0.034  | -0.045 |
| <b>185.074</b> | 0.011  | -0.023 | <b>255.298</b> | 0.110  | 0.127  | <b>389.204</b> | 0.019  | 0.023  |
| <b>185.095</b> | 0.125  | 0.040  | <b>255.317</b> | 0.003  | -0.009 | <b>389.209</b> | 0.041  | -0.018 |
| <b>185.102</b> | 0.054  | 0.047  | <b>255.335</b> | 0.073  | 0.057  | <b>389.215</b> | 0.019  | 0.023  |
| <b>185.108</b> | 0.058  | -0.077 | <b>255.374</b> | -0.002 | -0.026 | <b>389.22</b>  | -0.007 | -0.007 |
| <b>185.14</b>  | 0.016  | 0.004  | <b>256.025</b> | 0.010  | 0.012  | <b>389.225</b> | 0.005  | -0.009 |
| <b>185.148</b> | 0.044  | 0.026  | <b>256.053</b> | 0.042  | 0.044  | <b>389.233</b> | 0.013  | -0.006 |
| <b>185.171</b> | 0.003  | -0.003 | <b>256.058</b> | 0.002  | -0.030 | <b>389.244</b> | 0.012  | 0.017  |
| <b>185.211</b> | 0.014  | 0.039  | <b>256.066</b> | 0.026  | 0.037  | <b>389.256</b> | 0.005  | -0.005 |
| <b>185.243</b> | 0.015  | 0.013  | <b>256.09</b>  | 0.003  | -0.002 | <b>390.025</b> | 0.016  | -0.033 |
| <b>185.251</b> | 0.010  | 0.010  | <b>256.098</b> | 0.016  | 0.022  | <b>390.031</b> | 0.068  | 0.032  |
| <b>185.26</b>  | -0.246 | 0.037  | <b>256.105</b> | 0.023  | 0.035  | <b>390.04</b>  | 0.064  | 0.003  |
| <b>185.312</b> | -0.149 | 0.024  | <b>256.11</b>  | 0.008  | -0.037 | <b>390.047</b> | -0.005 | -0.052 |
| <b>185.384</b> | -0.087 | 0.006  | <b>256.12</b>  | -0.003 | -0.010 | <b>390.058</b> | 0.010  | 0.014  |
| <b>185.42</b>  | -0.091 | 0.007  | <b>256.132</b> | 0.009  | -0.026 | <b>390.173</b> | 0.030  | 0.038  |
| <b>185.429</b> | -0.159 | 0.030  | <b>256.138</b> | 0.059  | 0.052  | <b>390.181</b> | 0.007  | 0.005  |
| <b>185.458</b> | -0.016 | 0.001  | <b>256.144</b> | -0.004 | 0.070  | <b>390.187</b> | 0.011  | 0.016  |
| <b>185.504</b> | -0.016 | 0.001  | <b>256.15</b>  | -0.011 | -0.003 | <b>390.215</b> | 0.010  | 0.003  |
| <b>185.901</b> | -0.060 | 0.008  | <b>256.159</b> | 0.049  | -0.028 | <b>391.03</b>  | 0.007  | -0.005 |
| <b>185.909</b> | -0.012 | 0.004  | <b>256.169</b> | -0.011 | -0.032 | <b>391.193</b> | 0.117  | 0.034  |
| <b>185.931</b> | -0.135 | 0.016  | <b>256.253</b> | 0.012  | 0.035  | <b>391.198</b> | -0.038 | -0.054 |
| <b>185.937</b> | -0.080 | 0.009  | <b>256.28</b>  | 0.012  | 0.017  | <b>391.203</b> | 0.023  | 0.005  |
| <b>185.945</b> | -0.012 | 0.004  | <b>257.061</b> | 0.011  | -0.005 | <b>391.213</b> | -0.016 | 0.001  |
| <b>185.97</b>  | -0.015 | 0.003  | <b>257.072</b> | -0.014 | 0.004  | <b>391.279</b> | -0.006 | -0.019 |
| <b>185.978</b> | -0.012 | 0.004  | <b>257.091</b> | -0.025 | 0.005  | <b>391.314</b> | -0.016 | 0.001  |
| <b>185.988</b> | -0.015 | 0.002  | <b>257.098</b> | 0.007  | -0.004 | <b>391.325</b> | 0.034  | 0.020  |
| <b>185.996</b> | -0.022 | 0.008  | <b>257.104</b> | 0.009  | 0.010  | <b>391.337</b> | -0.001 | -0.005 |
| <b>186.005</b> | -0.029 | 0.008  | <b>257.116</b> | 0.004  | 0.038  | <b>391.349</b> | 0.005  | -0.009 |
| <b>186.045</b> | 0.147  | 0.099  | <b>257.125</b> | 0.012  | 0.008  | <b>391.36</b>  | -0.016 | 0.001  |
| <b>186.054</b> | 0.003  | -0.043 | <b>257.131</b> | -0.031 | 0.002  | <b>391.371</b> | 0.039  | 0.044  |
| <b>186.061</b> | -0.240 | 0.034  | <b>257.14</b>  | -0.032 | -0.056 | <b>391.383</b> | 0.020  | -0.019 |
| <b>186.09</b>  | 0.019  | -0.002 | <b>257.149</b> | -0.007 | 0.029  | <b>391.389</b> | 0.010  | 0.010  |
| <b>186.098</b> | 0.116  | 0.089  | <b>257.154</b> | 0.043  | 0.015  | <b>391.413</b> | -0.016 | 0.001  |
| <b>186.105</b> | 0.081  | -0.077 | <b>257.161</b> | 0.064  | 0.036  | <b>391.418</b> | 0.074  | 0.025  |
| <b>186.129</b> | -0.002 | -0.026 | <b>257.17</b>  | 0.023  | 0.013  | <b>391.425</b> | 0.028  | -0.013 |
| <b>186.146</b> | 0.033  | 0.003  | <b>257.181</b> | 0.014  | 0.030  | <b>391.43</b>  | 0.000  | -0.035 |
| <b>186.153</b> | -0.005 | -0.063 | <b>257.224</b> | 0.005  | -0.009 | <b>391.464</b> | 0.013  | -0.006 |
| <b>186.163</b> | -0.008 | 0.025  | <b>257.266</b> | 0.025  | 0.024  | <b>392.185</b> | 0.009  | -0.006 |
| <b>186.17</b>  | 0.075  | 0.086  | <b>257.276</b> | 0.010  | 0.003  | <b>392.191</b> | 0.096  | 0.002  |
| <b>186.177</b> | 0.052  | -0.001 | <b>257.304</b> | 0.006  | -0.002 | <b>392.196</b> | 0.004  | -0.094 |
| <b>186.185</b> | -0.007 | -0.059 | <b>257.35</b>  | 0.010  | 0.014  | <b>392.201</b> | 0.040  | 0.011  |
| <b>186.192</b> | 0.008  | -0.014 | <b>257.36</b>  | 0.007  | 0.010  | <b>392.21</b>  | 0.021  | 0.050  |
| <b>186.217</b> | 0.006  | -0.011 | <b>258.052</b> | 0.017  | 0.028  | <b>393.182</b> | 0.002  | -0.030 |
| <b>186.454</b> | -0.051 | 0.010  | <b>258.059</b> | 0.073  | 0.096  | <b>393.2</b>   | 0.012  | 0.017  |
| <b>186.465</b> | -0.027 | 0.000  | <b>258.068</b> | 0.016  | 0.024  | <b>396.171</b> | 0.011  | -0.012 |

|                |        |        |                |        |        |                |       |        |
|----------------|--------|--------|----------------|--------|--------|----------------|-------|--------|
| <b>186.48</b>  | -0.013 | 0.001  | <b>258.074</b> | 0.015  | 0.012  | <b>396.183</b> | 0.055 | -0.097 |
| <b>186.497</b> | -0.027 | 0.005  | <b>258.081</b> | -0.029 | 0.002  | <b>396.188</b> | 0.007 | -0.009 |
| <b>186.512</b> | -0.141 | 0.021  | <b>258.088</b> | -0.075 | 0.013  | <b>396.26</b>  | 0.003 | -0.008 |
| <b>186.549</b> | -0.030 | 0.006  | <b>258.099</b> | -0.007 | 0.032  | <b>408.192</b> | 0.009 | 0.011  |
| <b>187</b>     | -0.015 | 0.002  | <b>258.11</b>  | -0.014 | -0.017 | <b>408.211</b> | 0.007 | -0.008 |
| <b>187.053</b> | 0.007  | -0.025 | <b>258.115</b> | 0.022  | 0.024  | <b>408.219</b> | 0.022 | -0.033 |
| <b>187.064</b> | -0.246 | 0.035  | <b>258.128</b> | 0.042  | -0.083 | <b>422.169</b> | 0.012 | 0.017  |
| <b>187.08</b>  | 0.052  | 0.039  | <b>258.137</b> | 0.049  | 0.080  | <b>422.177</b> | 0.010 | 0.014  |
| <b>187.088</b> | 0.114  | 0.037  | <b>258.144</b> | -0.005 | -0.038 | <b>423.175</b> | 0.007 | 0.005  |
| <b>187.095</b> | 0.046  | -0.001 | <b>258.149</b> | 0.012  | 0.017  | <b>433.27</b>  | 0.007 | -0.009 |
| <b>187.101</b> | -0.003 | -0.042 | <b>258.157</b> | 0.027  | 0.021  | <b>445.007</b> | 0.010 | 0.012  |
| <b>187.11</b>  | 0.015  | 0.003  | <b>258.162</b> | -0.016 | -0.005 | <b>445.013</b> | 0.028 | 0.010  |
| <b>187.125</b> | 0.012  | 0.011  | <b>258.17</b>  | 0.005  | -0.050 | <b>445.019</b> | 0.062 | -0.060 |
| <b>187.169</b> | -0.043 | 0.005  | <b>258.178</b> | 0.063  | 0.037  | <b>445.024</b> | 0.058 | -0.031 |
| <b>187.177</b> | -0.024 | 0.001  | <b>258.187</b> | 0.013  | 0.026  | <b>445.03</b>  | 0.030 | 0.061  |
| <b>187.185</b> | 0.004  | 0.037  | <b>258.215</b> | 0.019  | 0.004  | <b>445.036</b> | 0.010 | 0.010  |
| <b>187.201</b> | 0.005  | -0.007 | <b>258.221</b> | 0.011  | 0.016  | <b>462.035</b> | 0.005 | -0.005 |
| <b>187.209</b> | -0.155 | 0.016  | <b>258.253</b> | 0.033  | 0.034  | <b>462.041</b> | 0.010 | -0.015 |
| <b>187.217</b> | 0.017  | 0.030  | <b>258.262</b> | 0.152  | -0.024 | <b>462.047</b> | 0.009 | -0.016 |
| <b>187.225</b> | 0.020  | 0.009  | <b>258.287</b> | 0.014  | 0.028  | <b>462.053</b> | 0.004 | -0.008 |
| <b>187.241</b> | 0.007  | -0.005 | <b>258.295</b> | 0.042  | 0.029  | <b>470.094</b> | 0.011 | -0.012 |
| <b>187.248</b> | 0.017  | 0.034  | <b>258.3</b>   | 0.078  | -0.048 | <b>470.102</b> | 0.028 | -0.035 |
| <b>187.257</b> | -0.001 | 0.013  | <b>258.325</b> | 0.012  | 0.035  | <b>470.111</b> | 0.014 | -0.012 |
| <b>187.297</b> | -0.016 | 0.001  | <b>258.334</b> | 0.026  | 0.010  | <b>508.269</b> | 0.012 | -0.006 |
| <b>188.055</b> | 0.022  | 0.018  | <b>259.026</b> | 0.007  | 0.005  | <b>508.281</b> | 0.012 | -0.022 |
| <b>188.061</b> | -0.041 | 0.062  | <b>259.035</b> | -0.005 | -0.038 | <b>508.29</b>  | 0.041 | -0.024 |
| <b>188.07</b>  | -0.118 | 0.018  | <b>259.041</b> | 0.010  | 0.006  | <b>508.296</b> | 0.005 | -0.018 |
